# Supplementary material for: Aflatoxin B1 exposure causes splenic pyroptosis by disturbing the gut microbiota-immune axis
Source: Royal Society of Chemistry journal article supplement (doi:10.1039/d3fo04717b), 2024-01-01

1. The full gel photos of Figure 2F (marker —M)

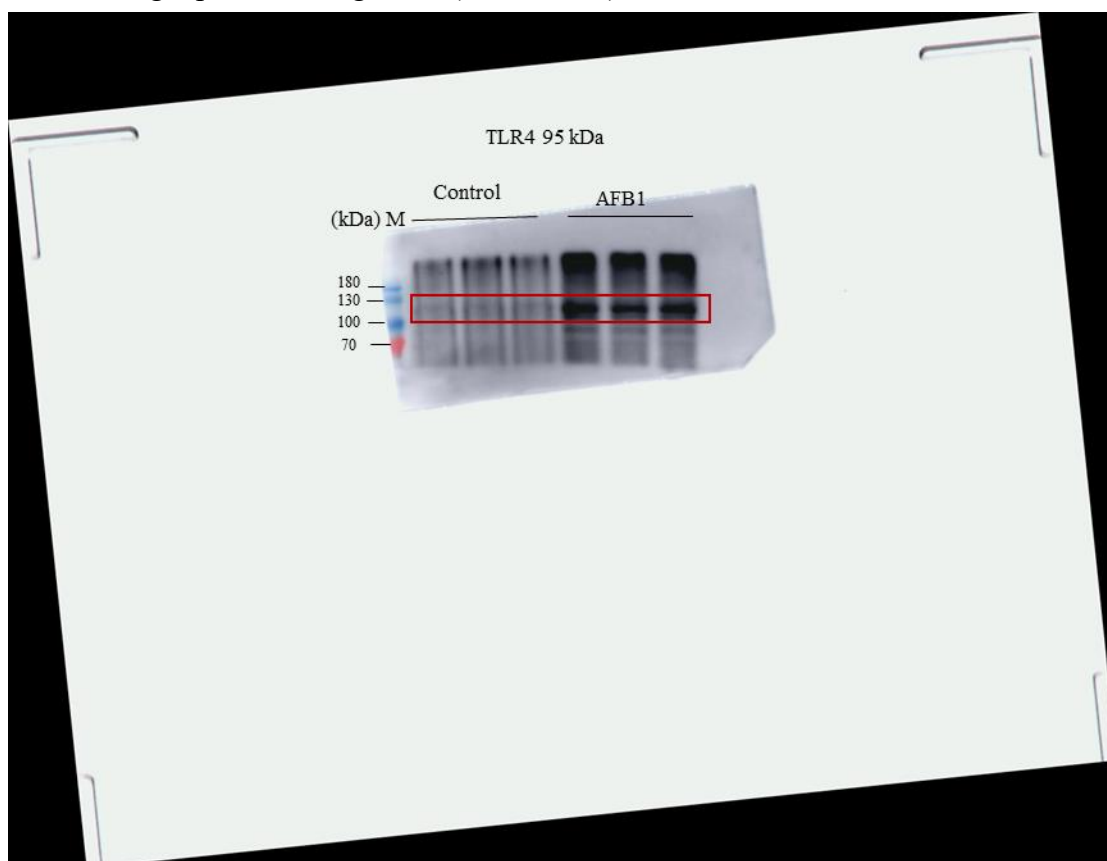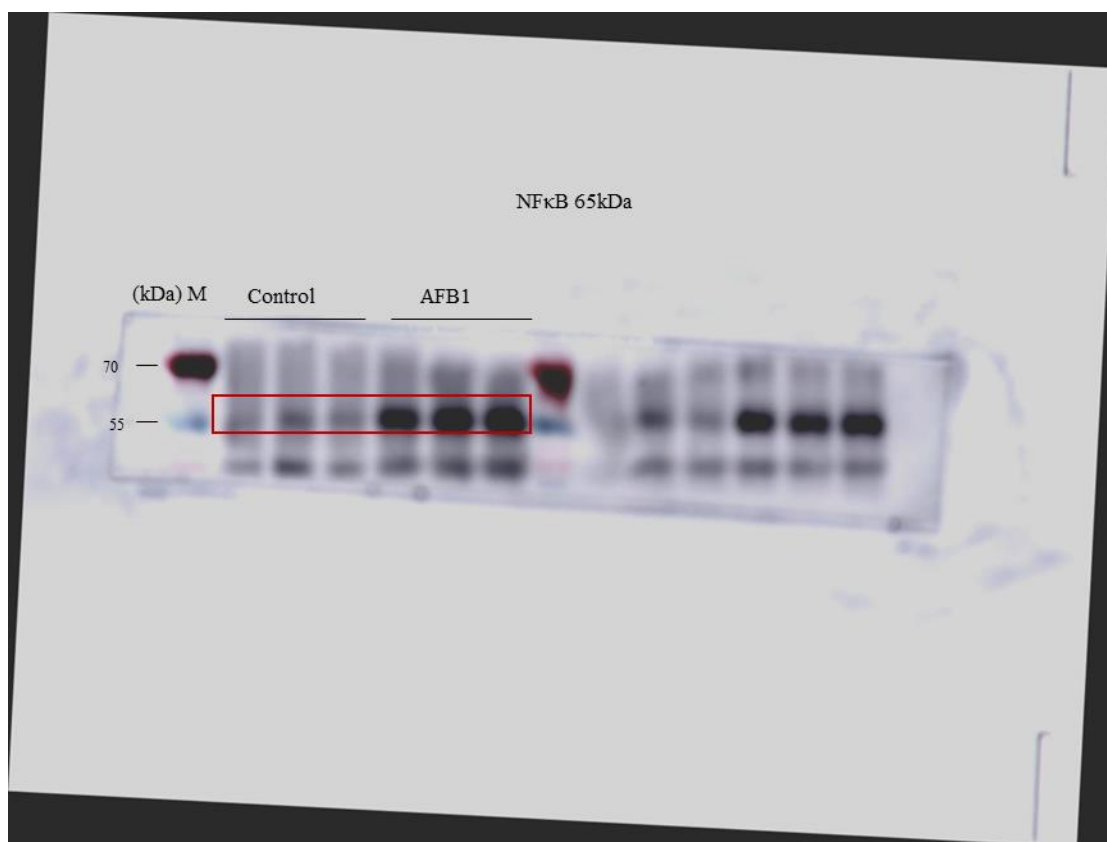

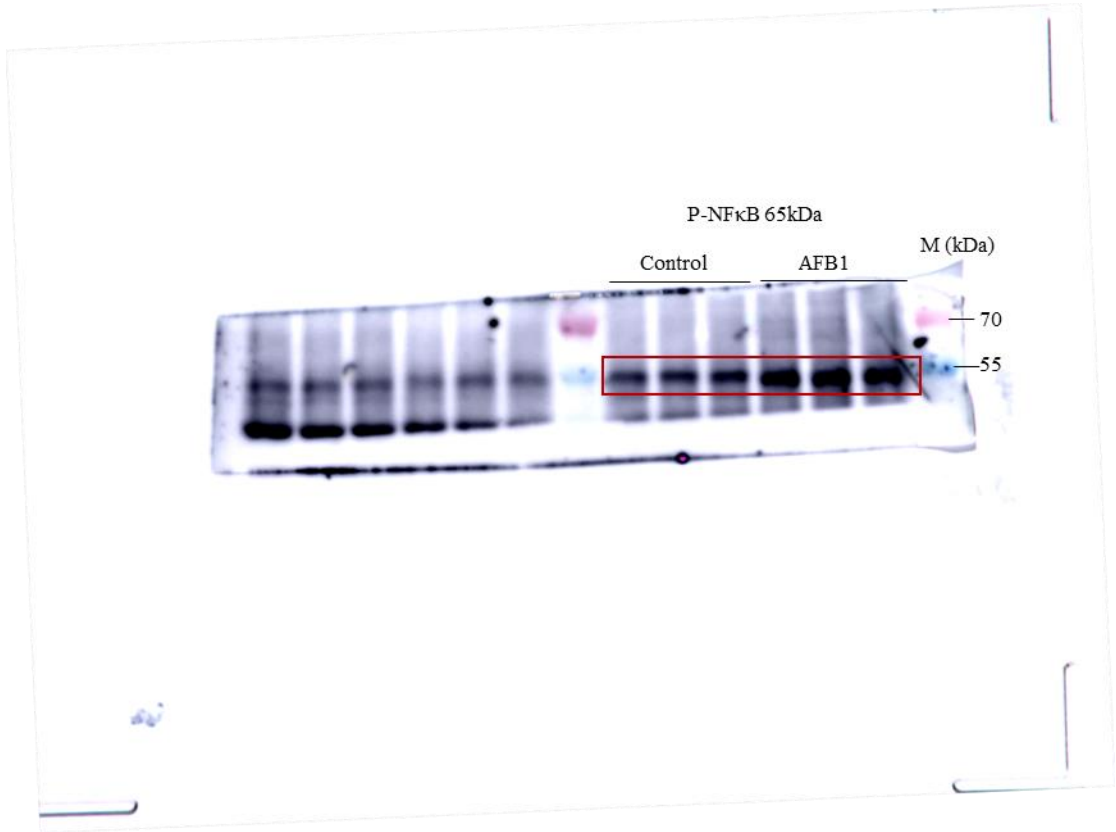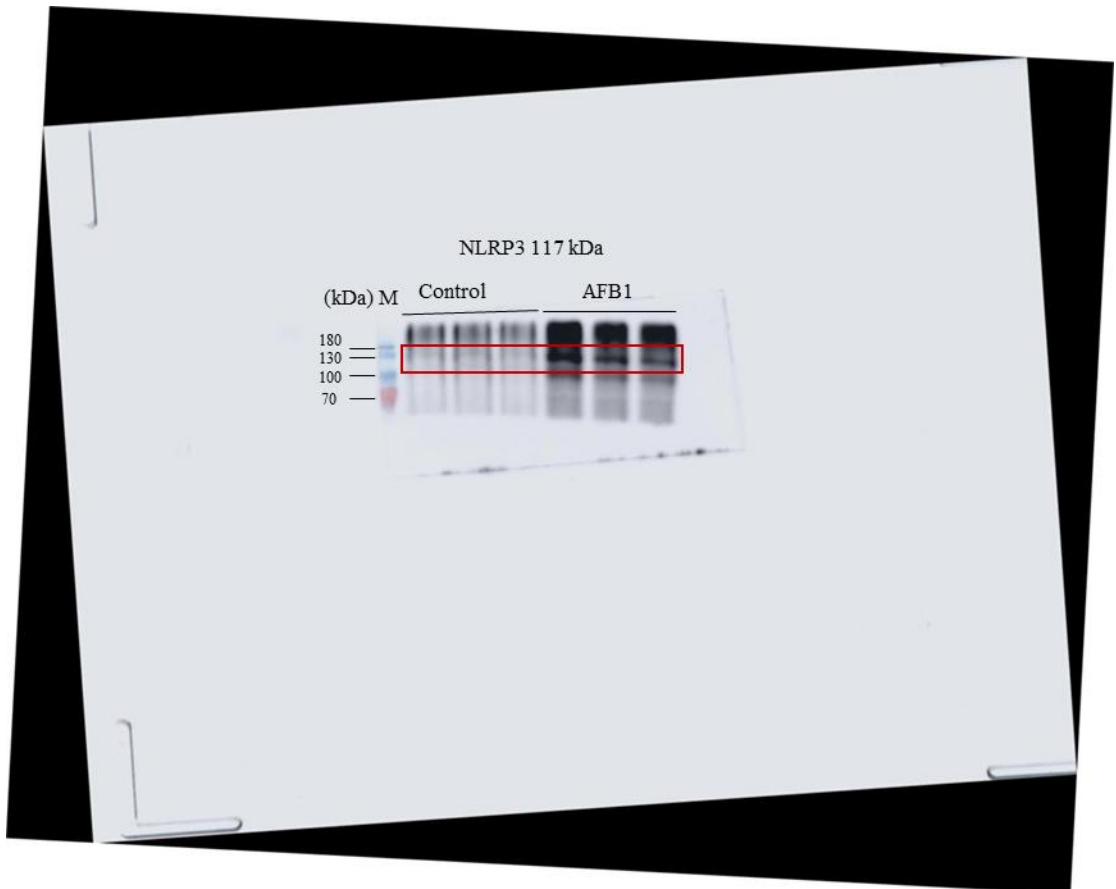

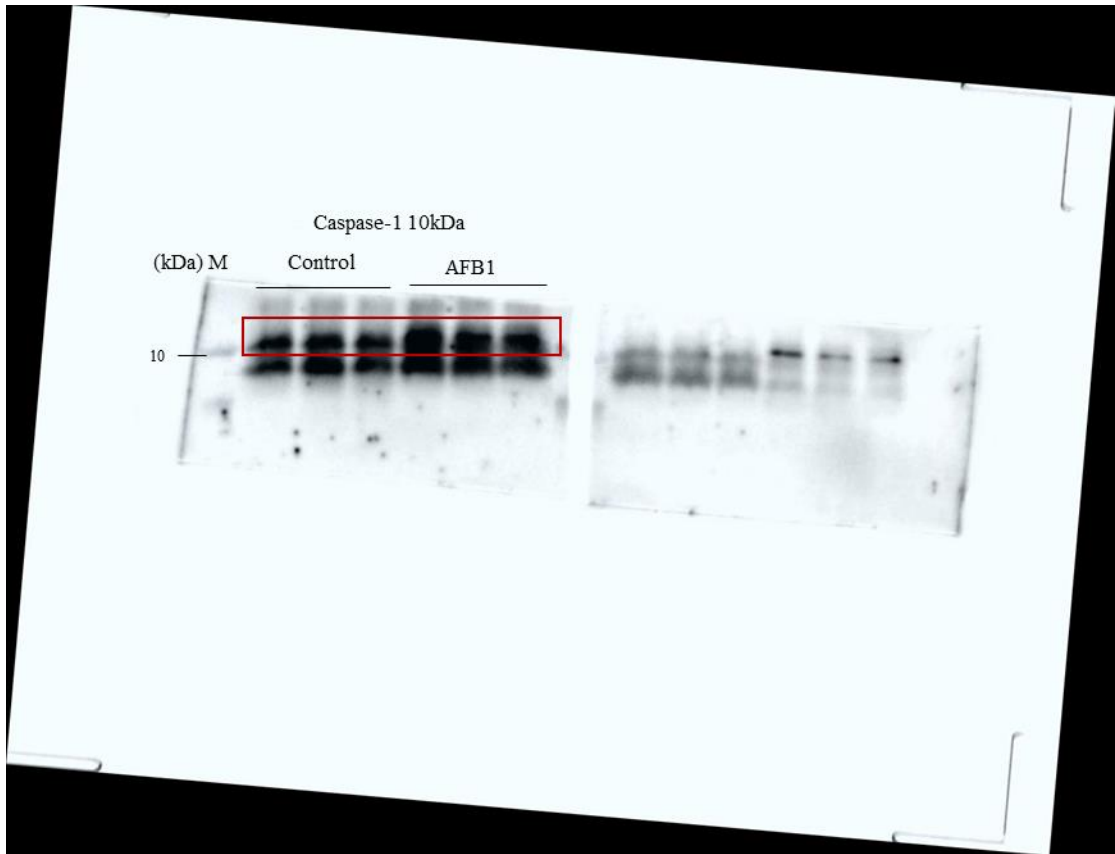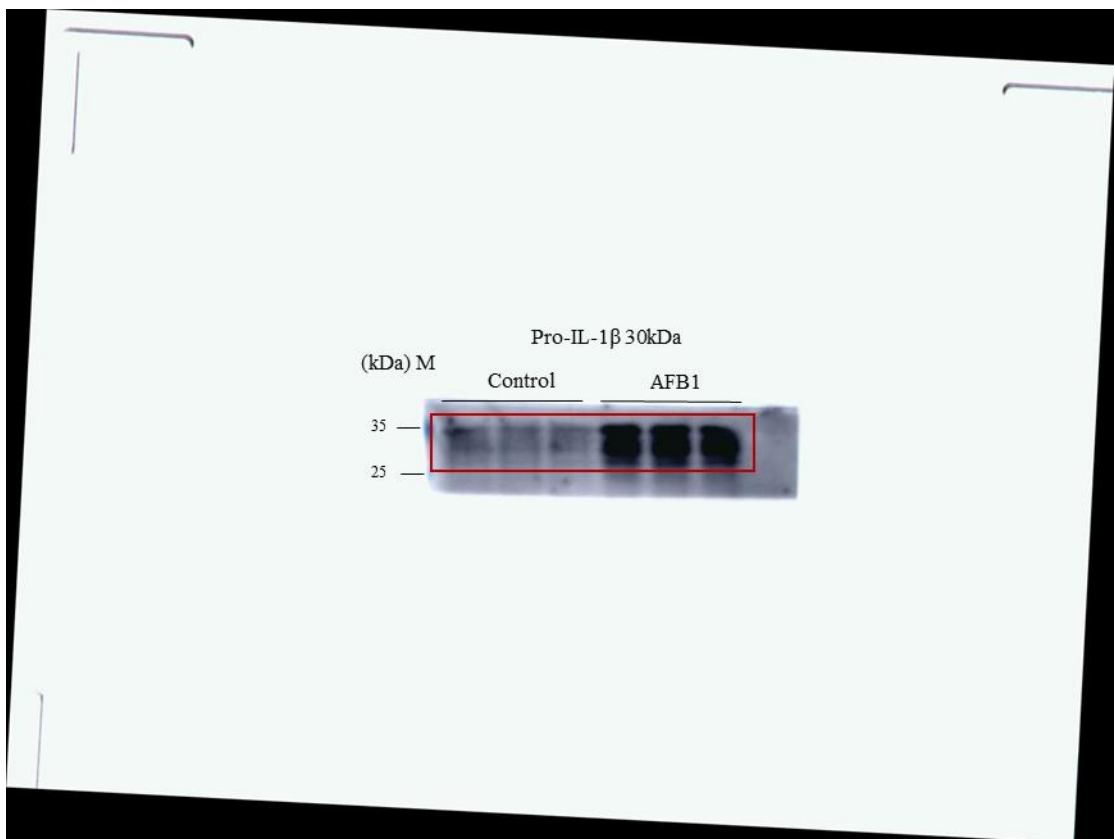

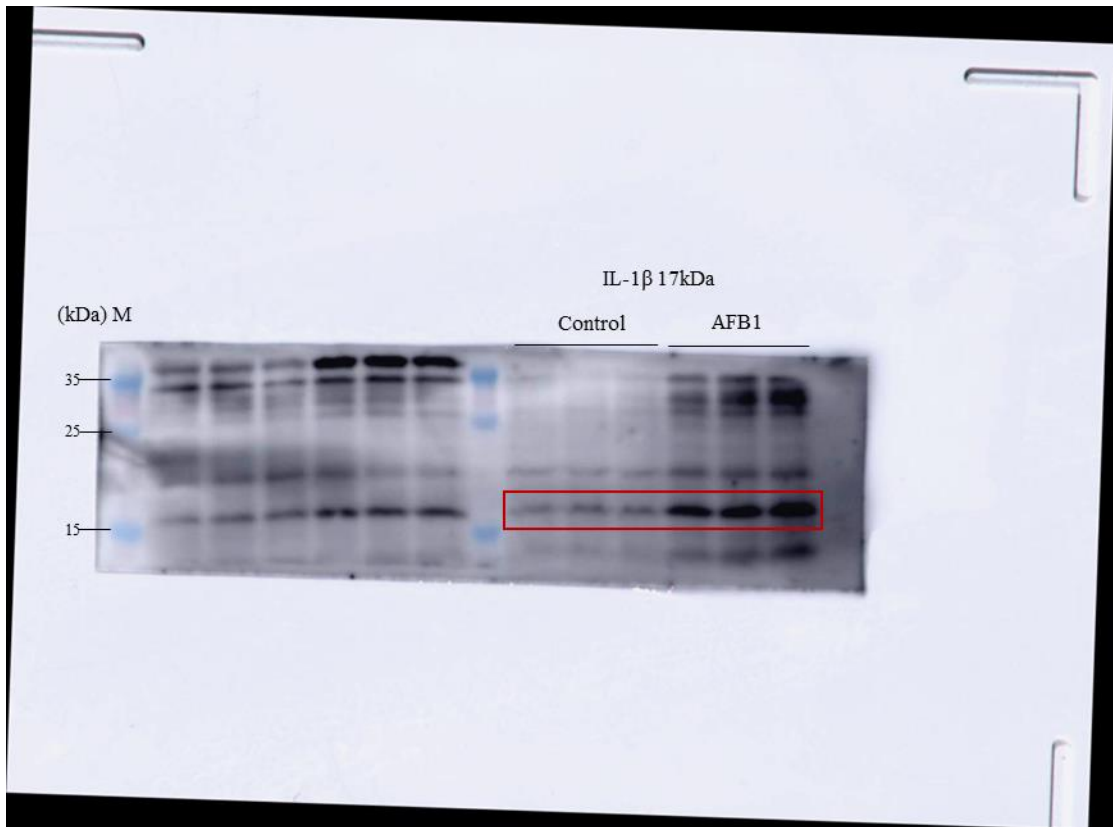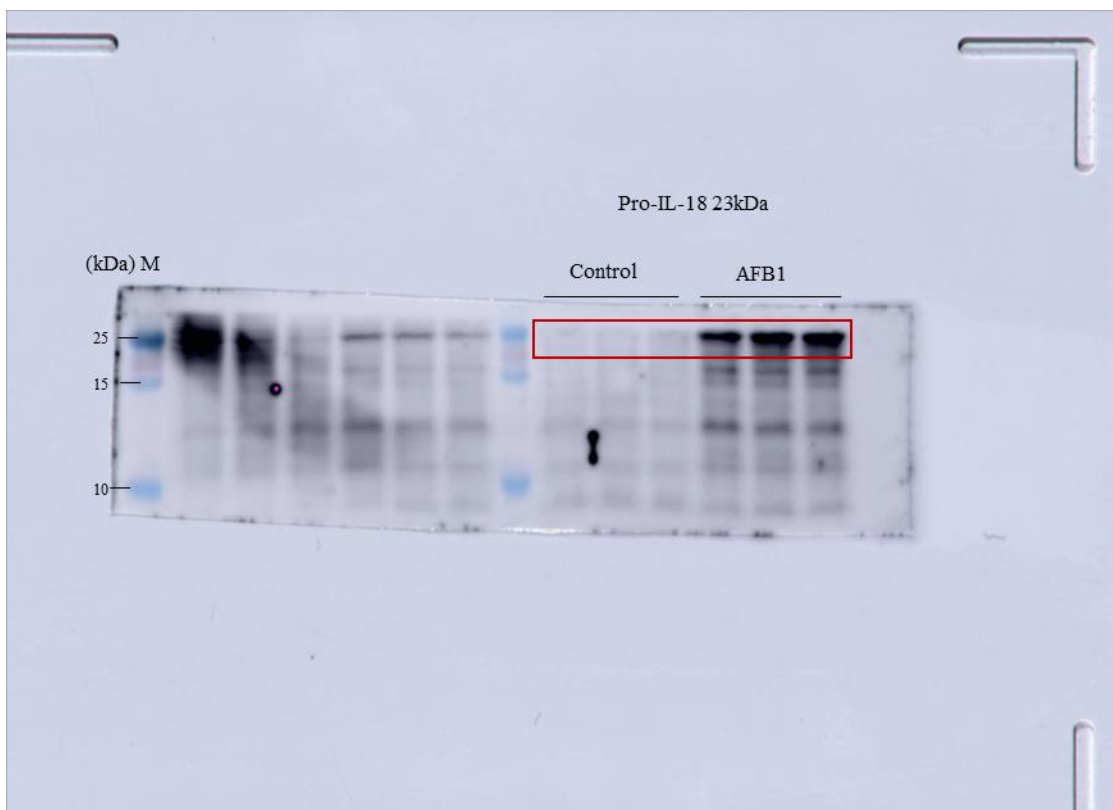

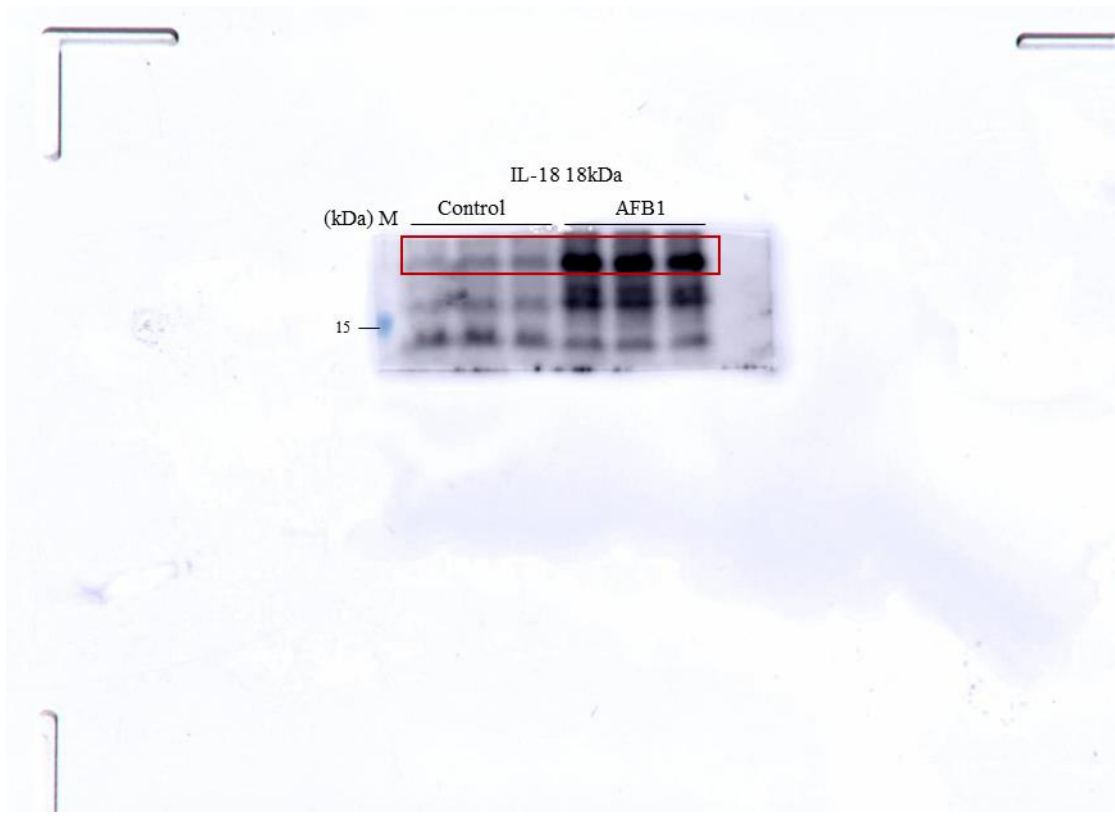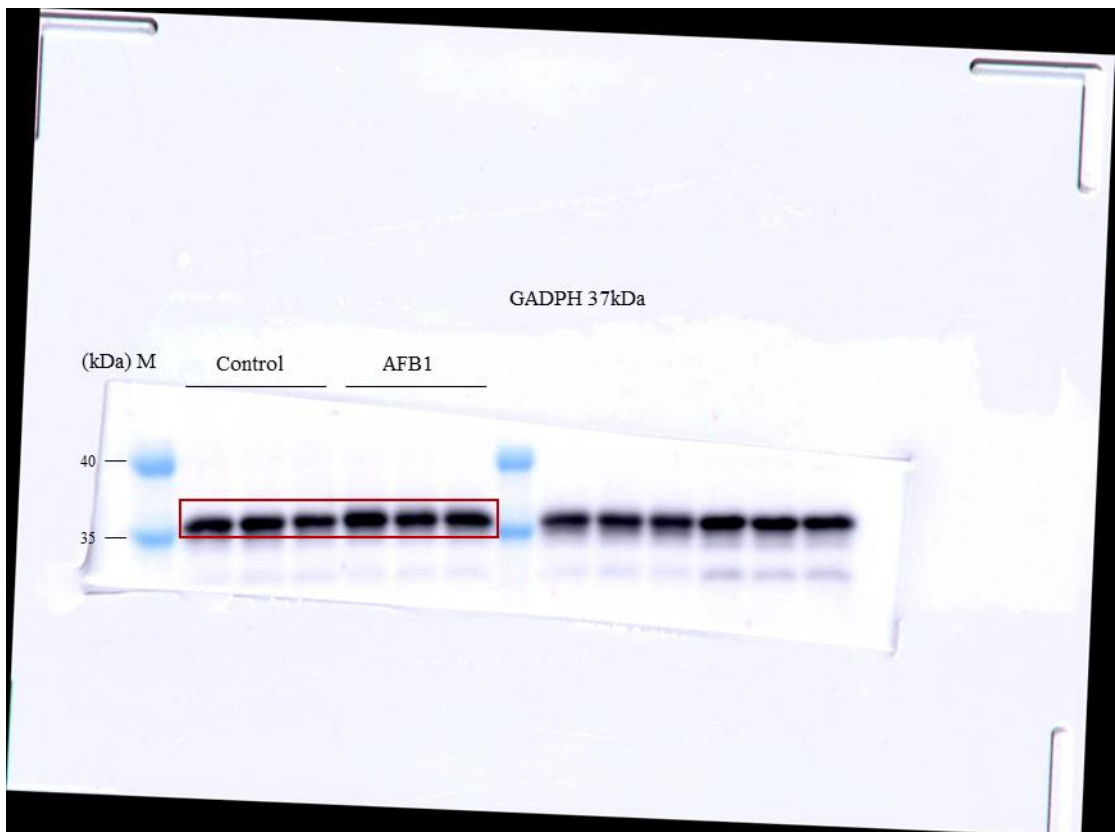

2. The full gel photos of Figure4E

TLR4 95kDa

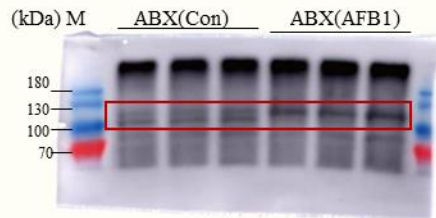

NFκB 65kDa

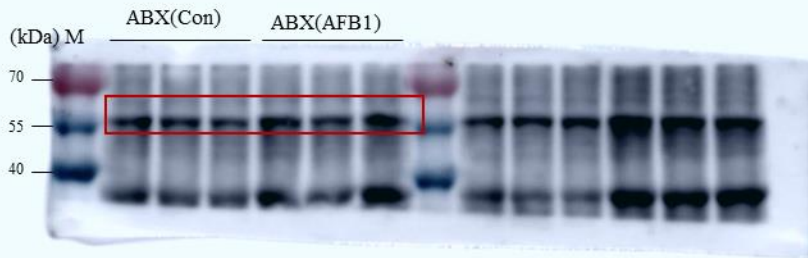

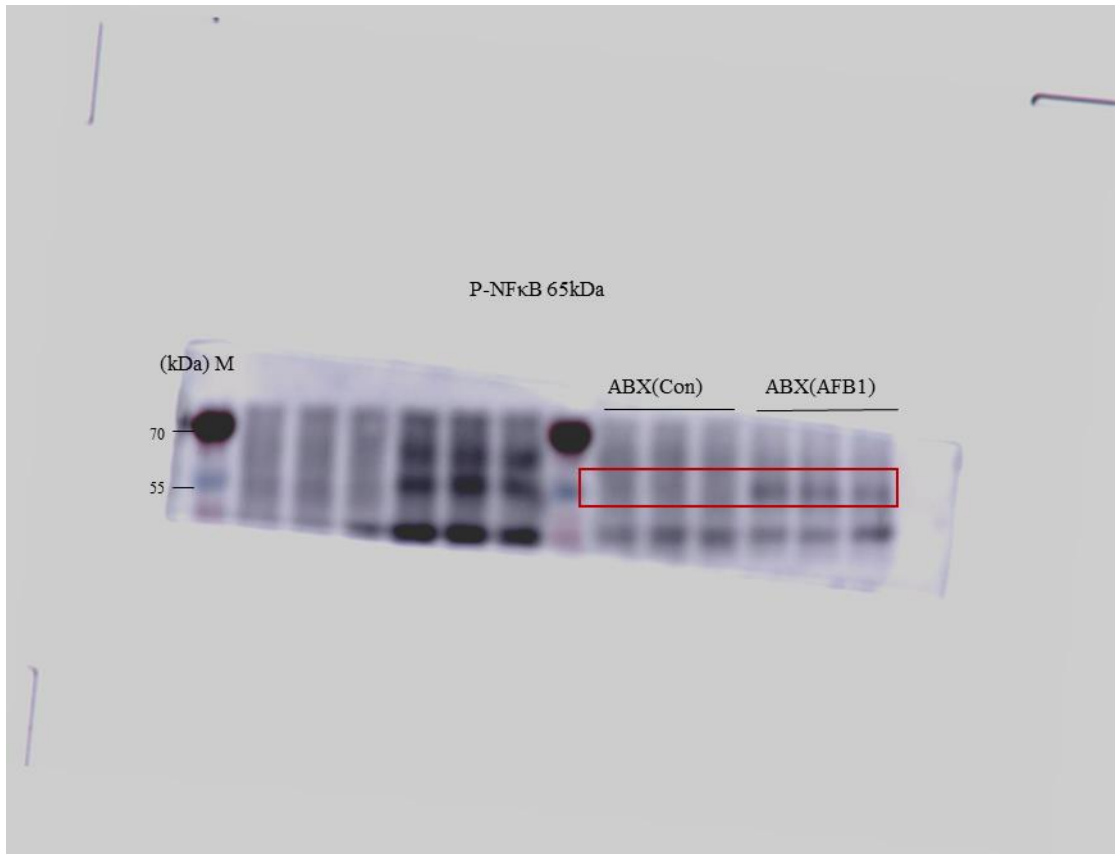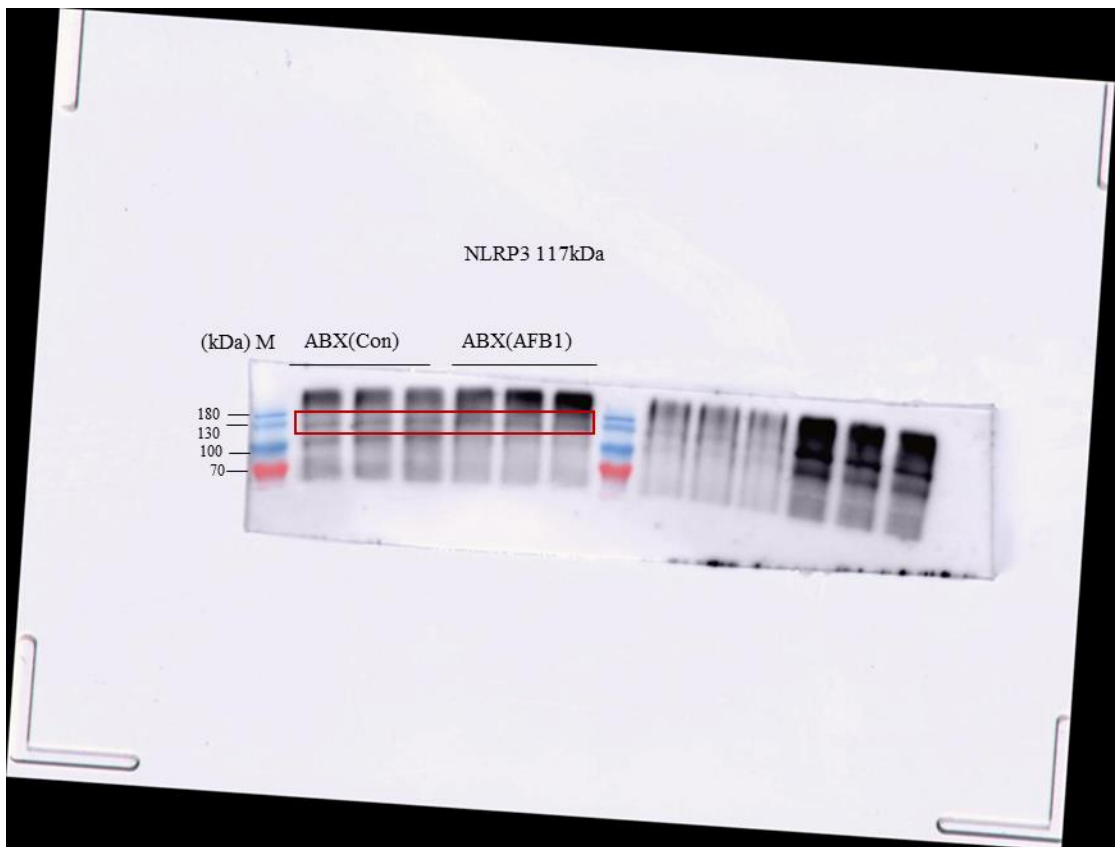

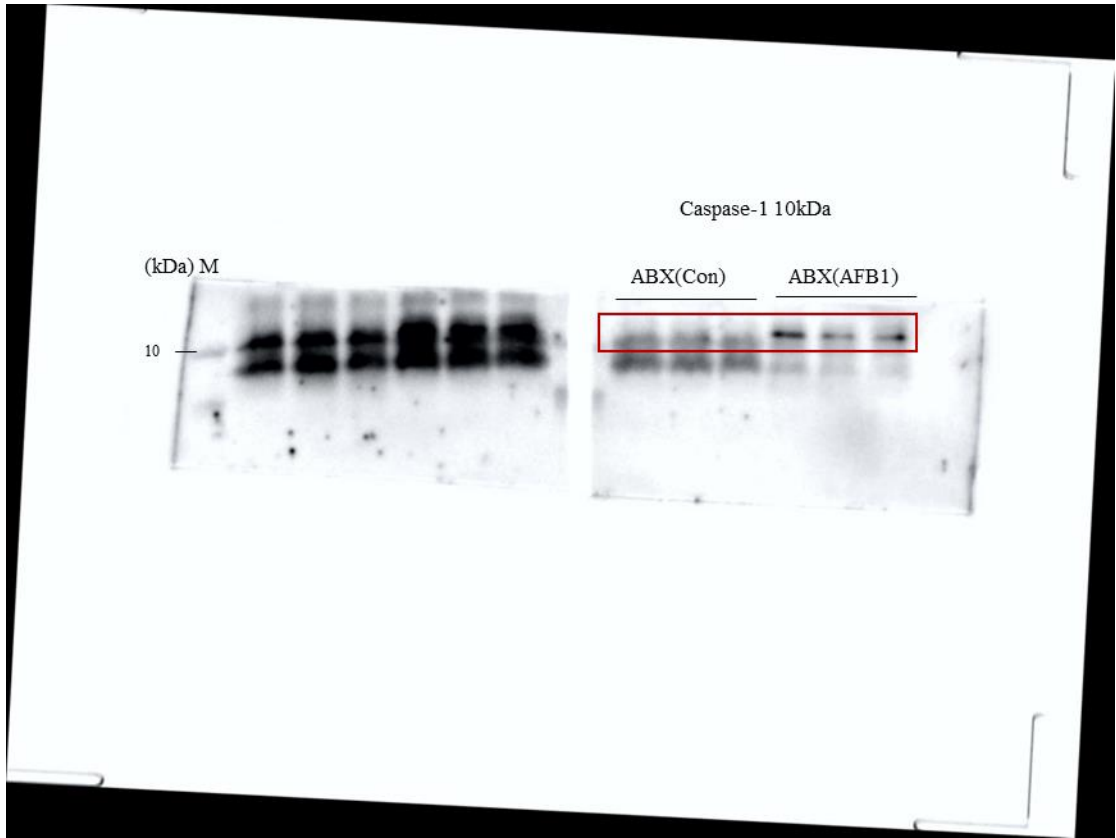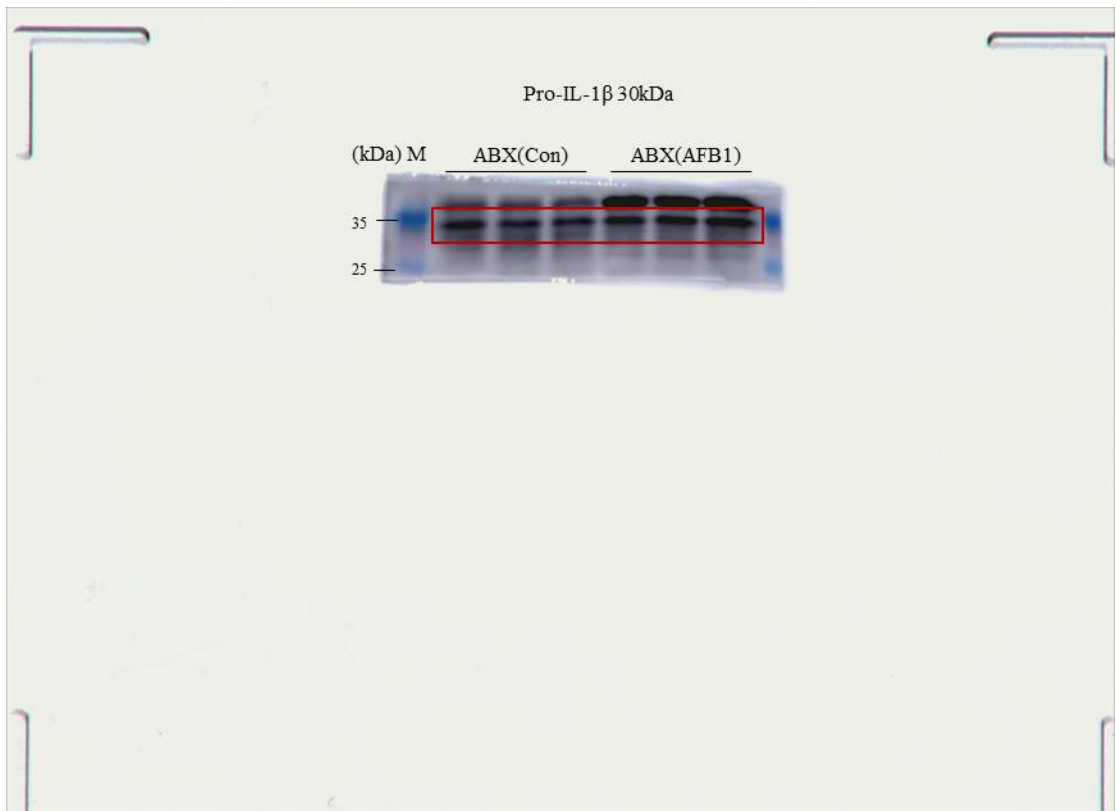



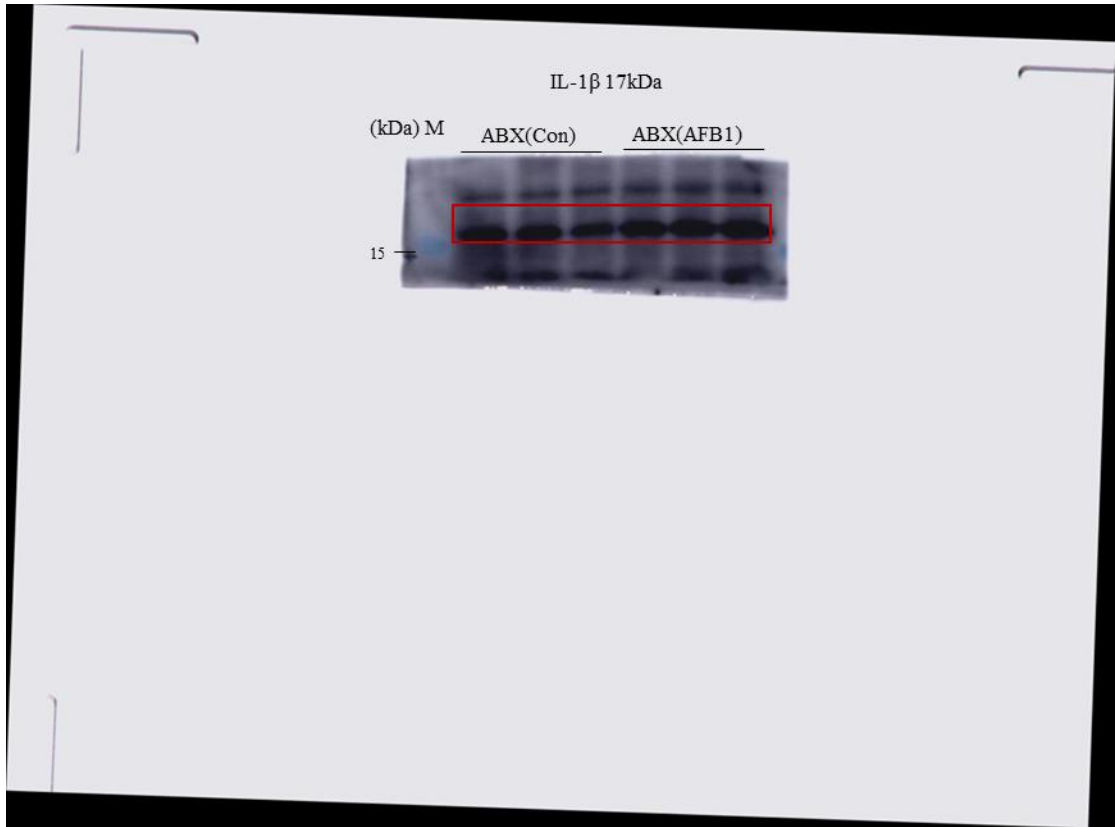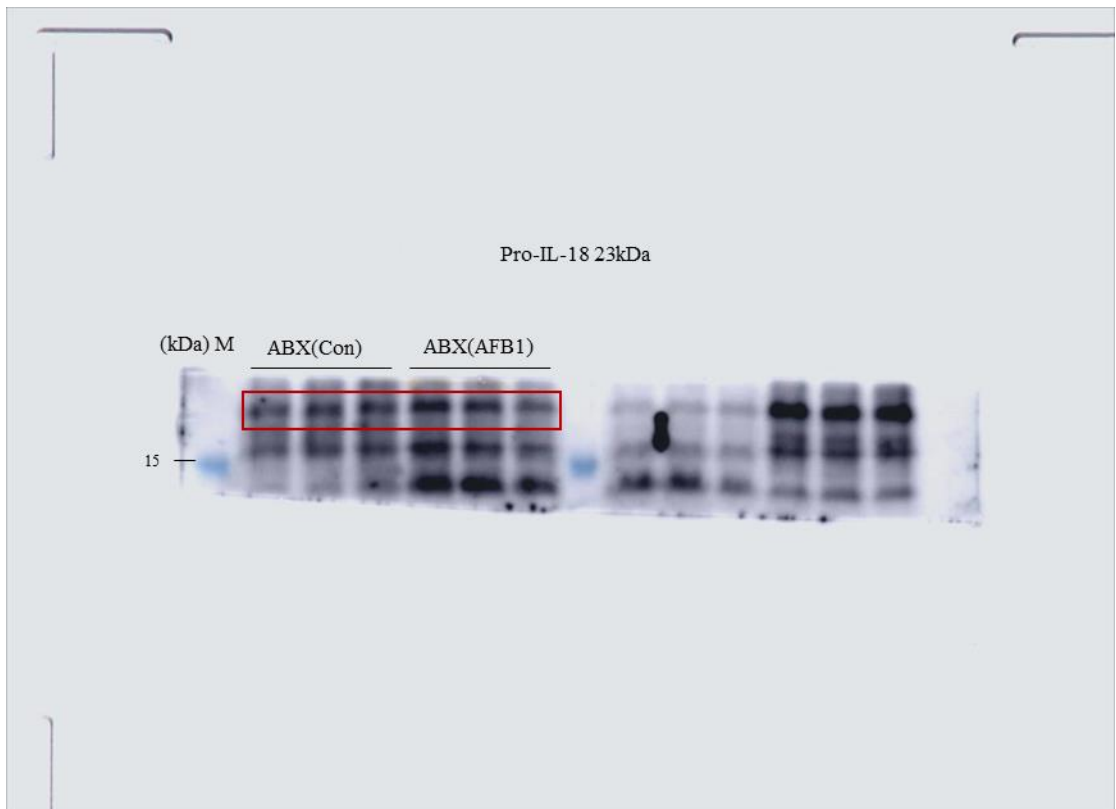

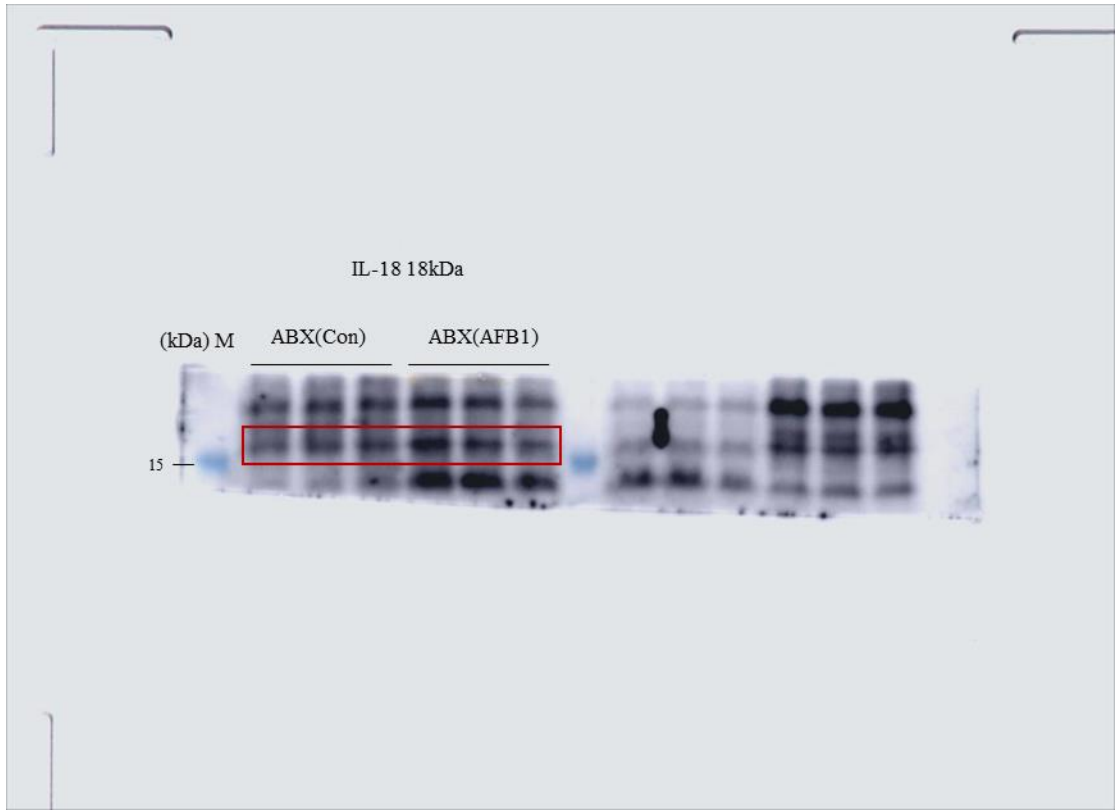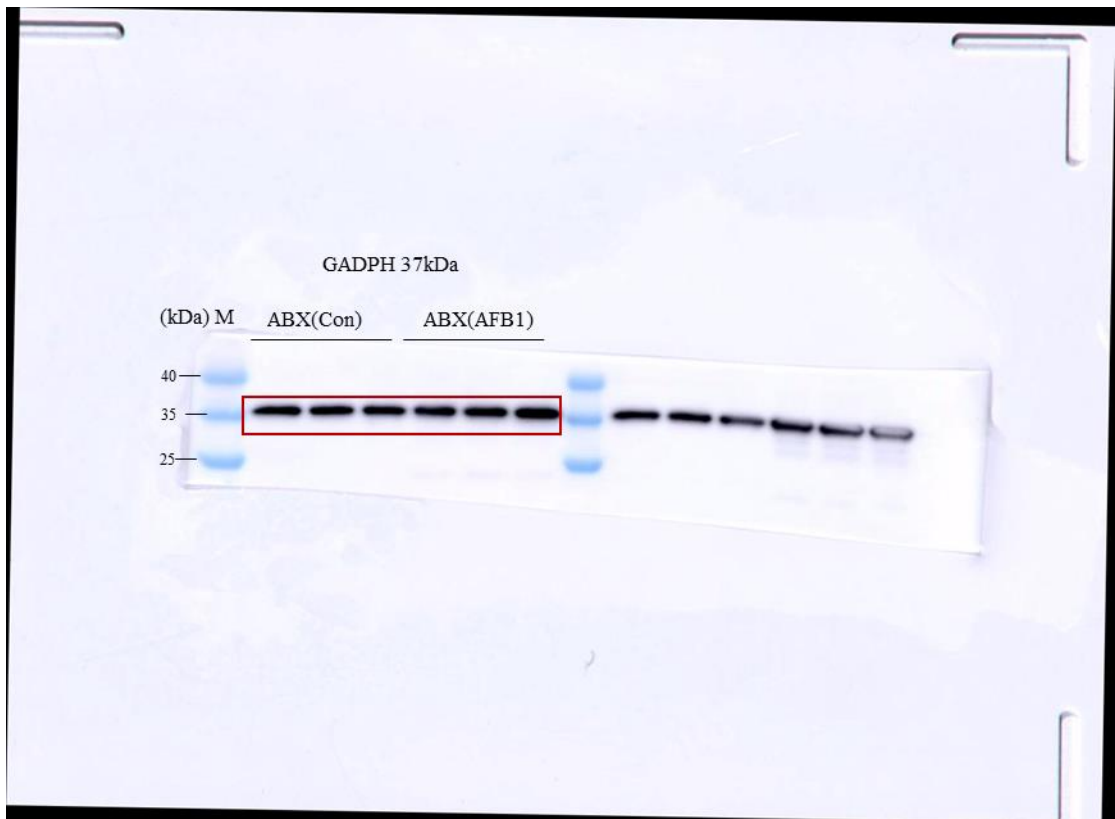

3. The full gel photos of Figure6E

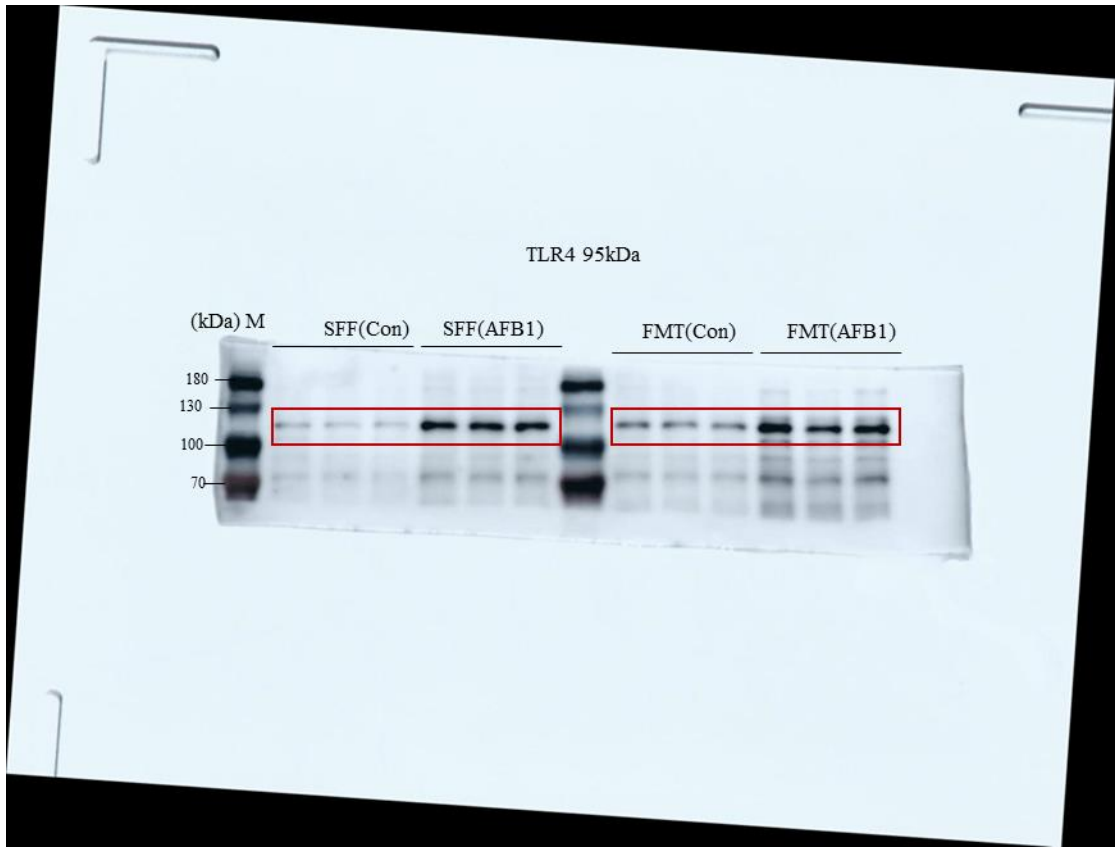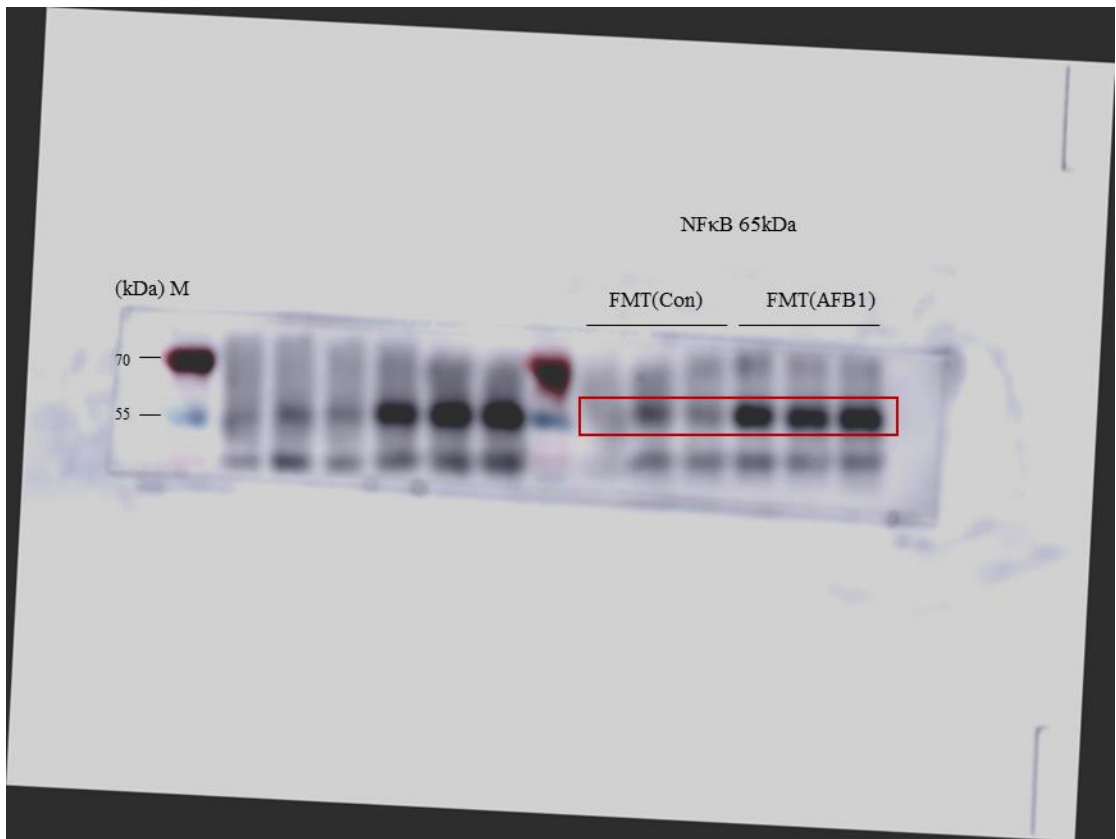

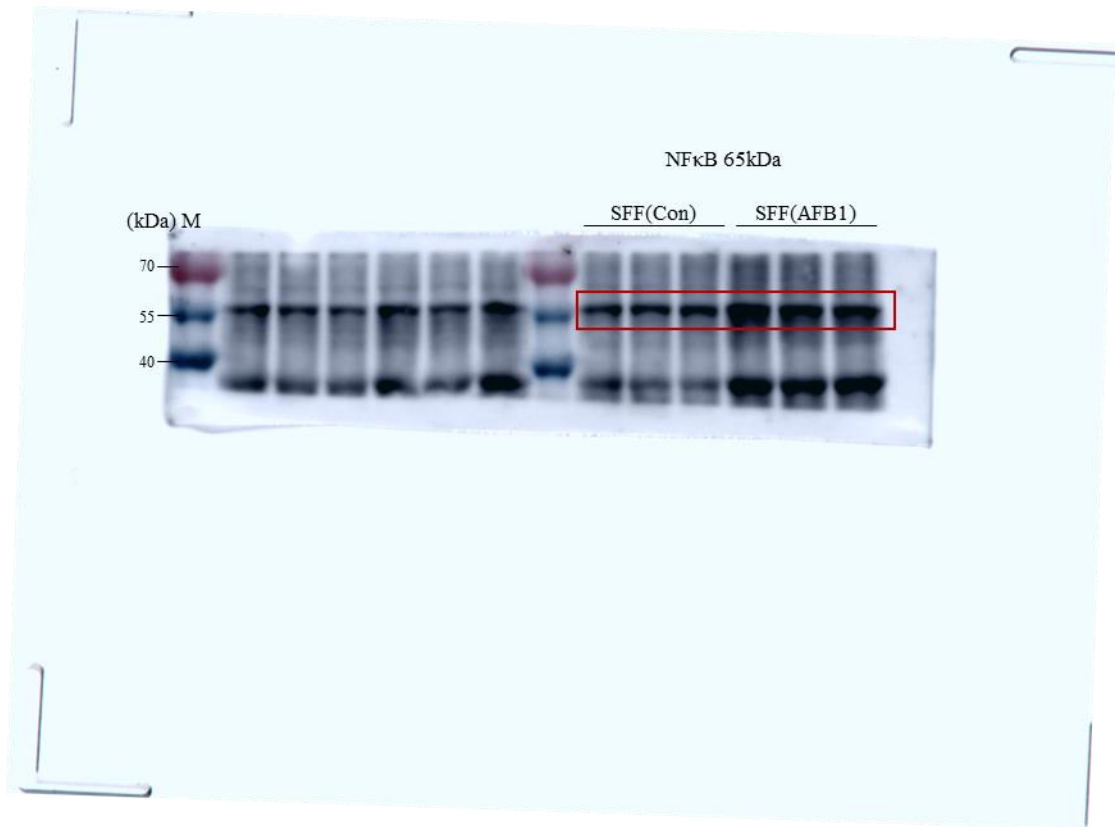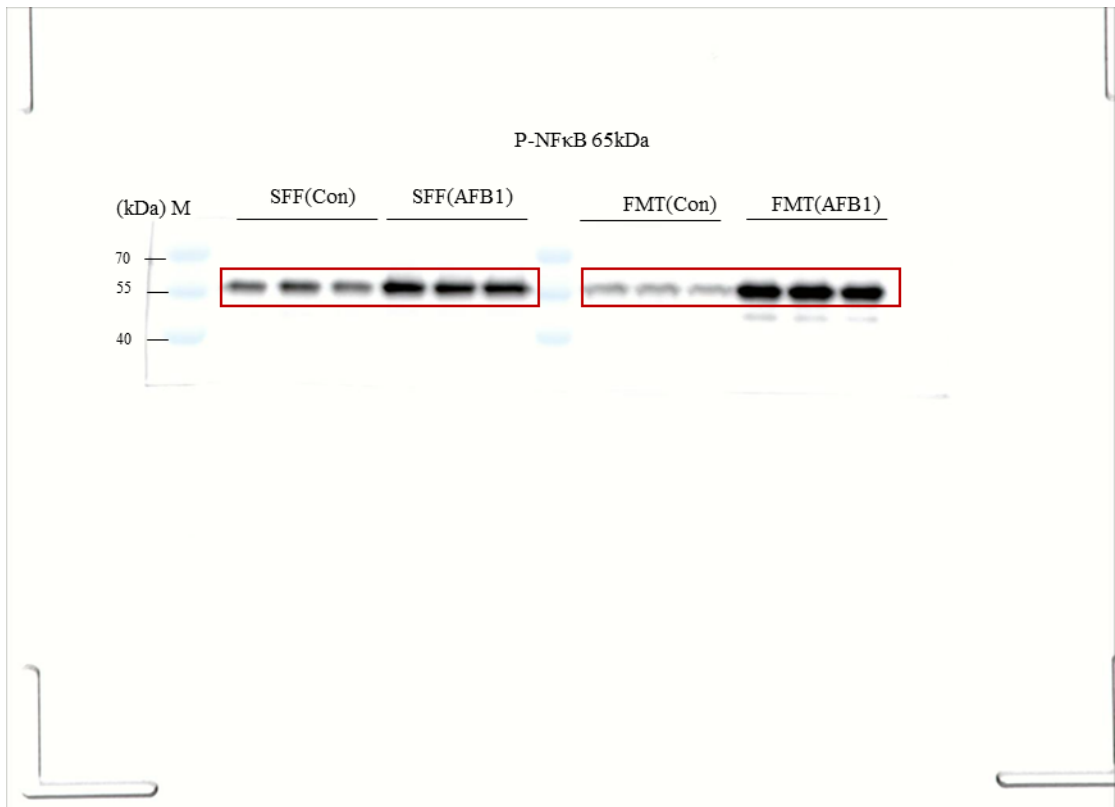

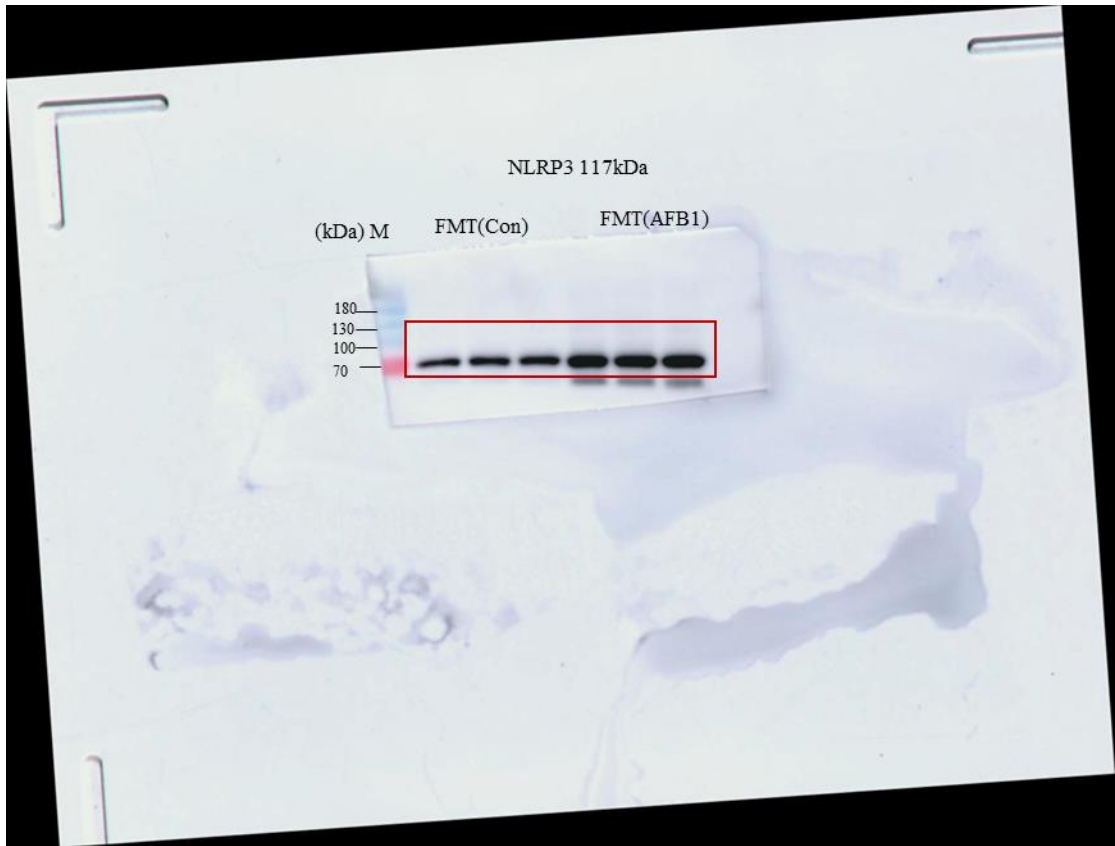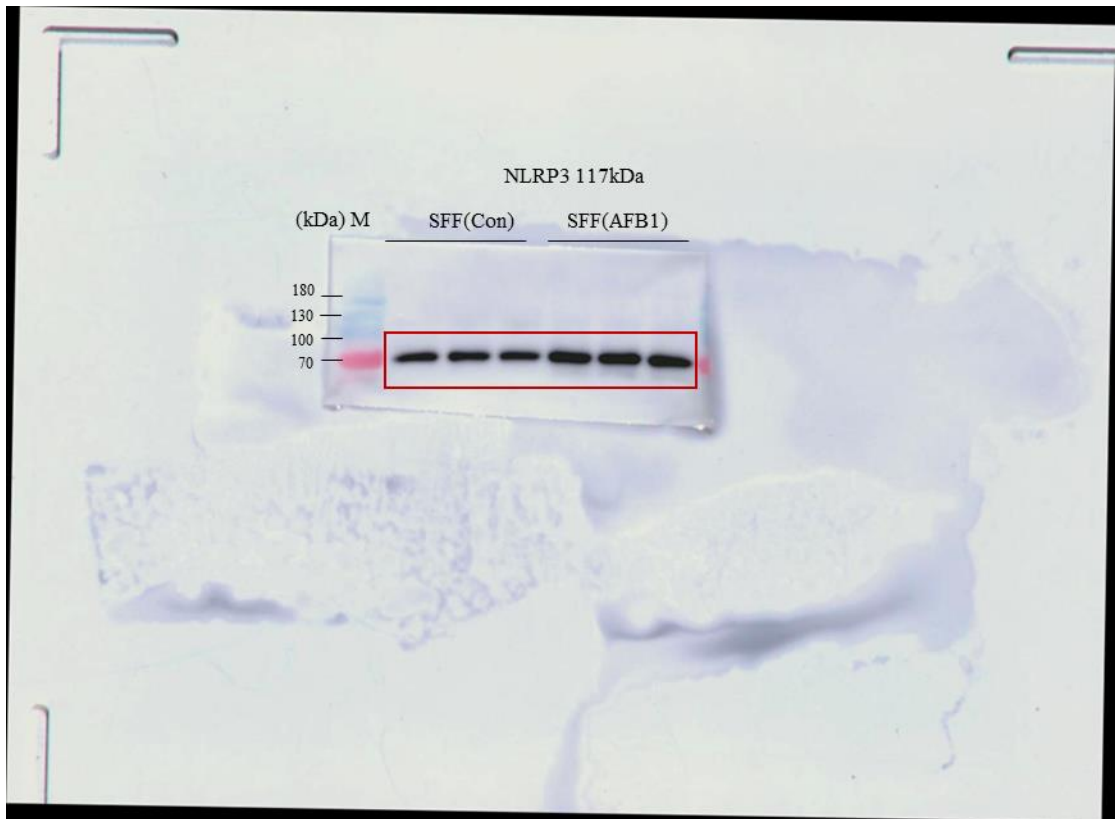

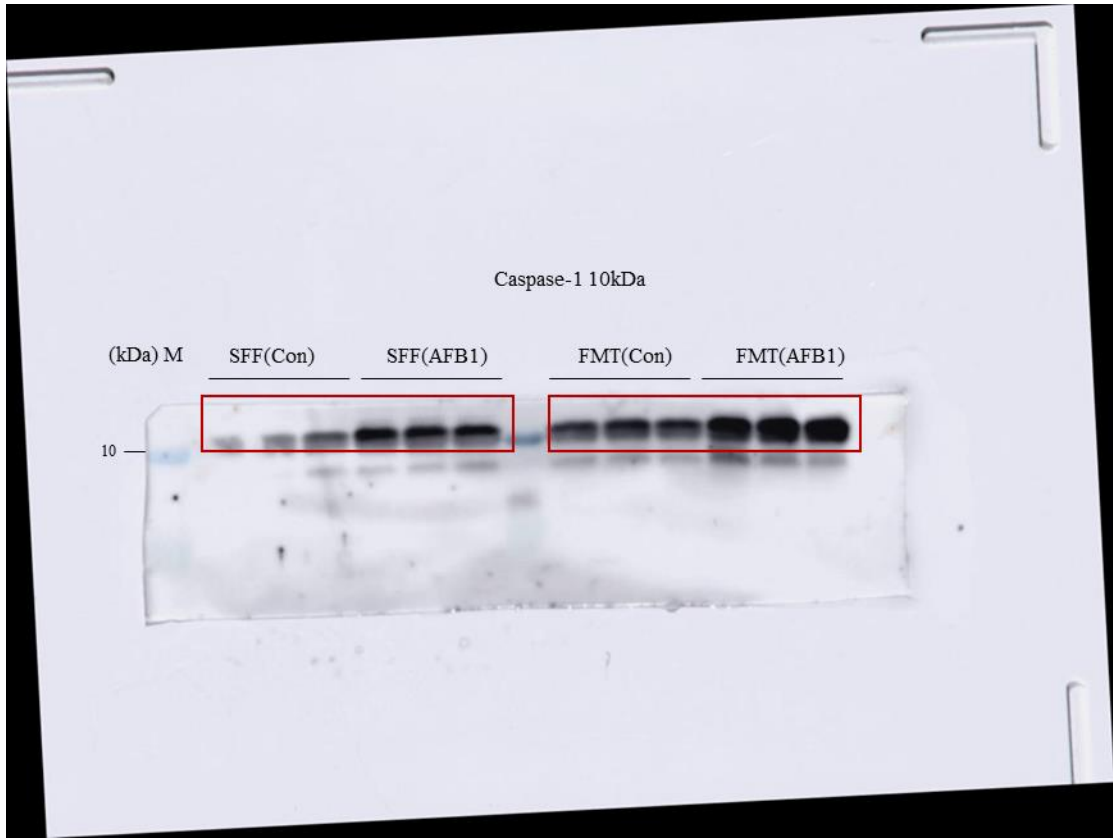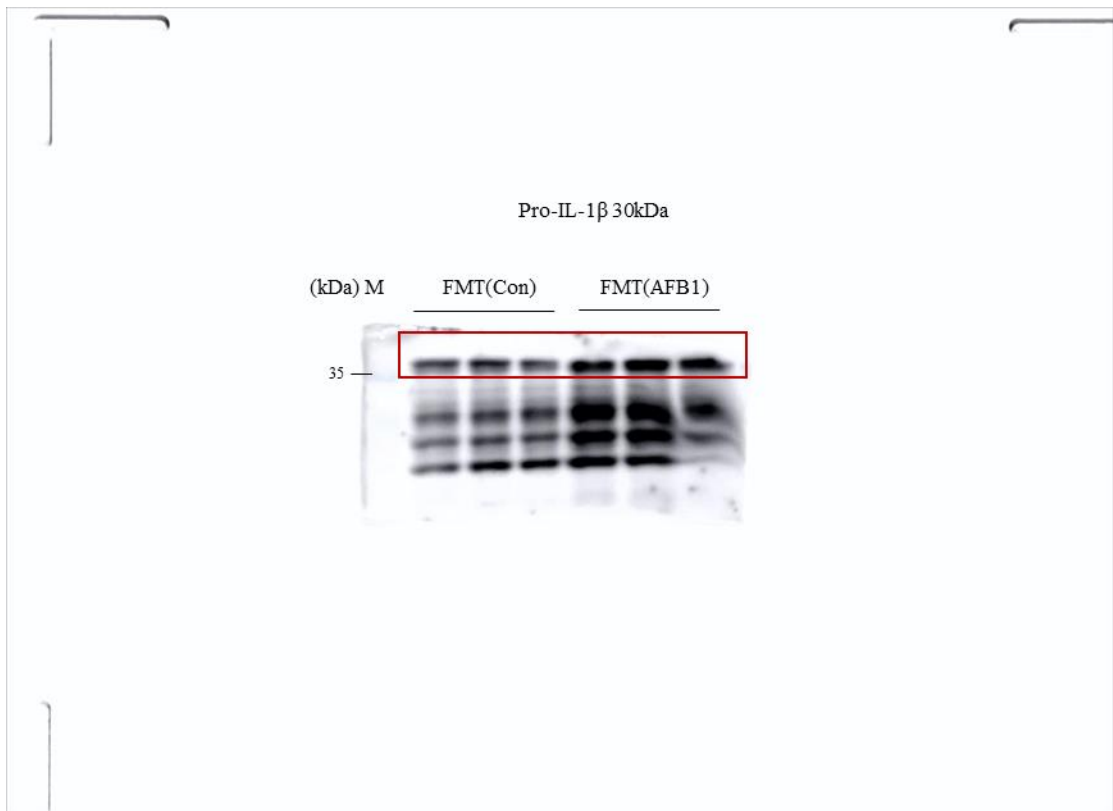

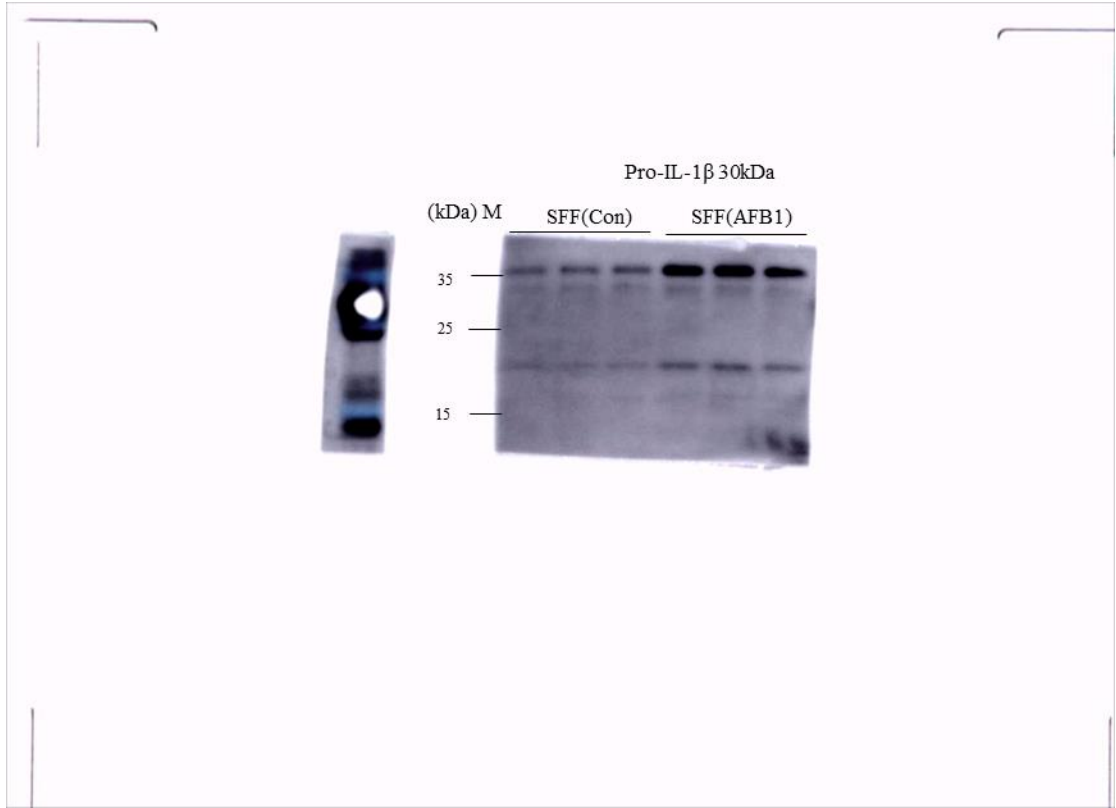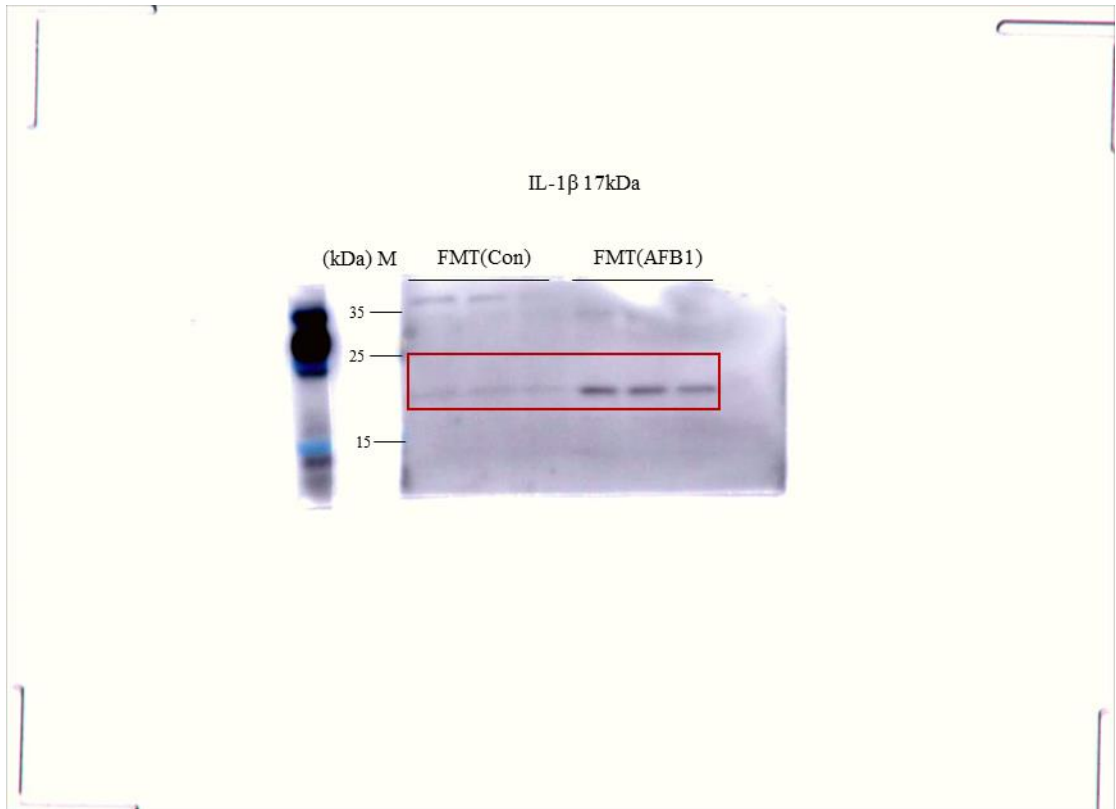

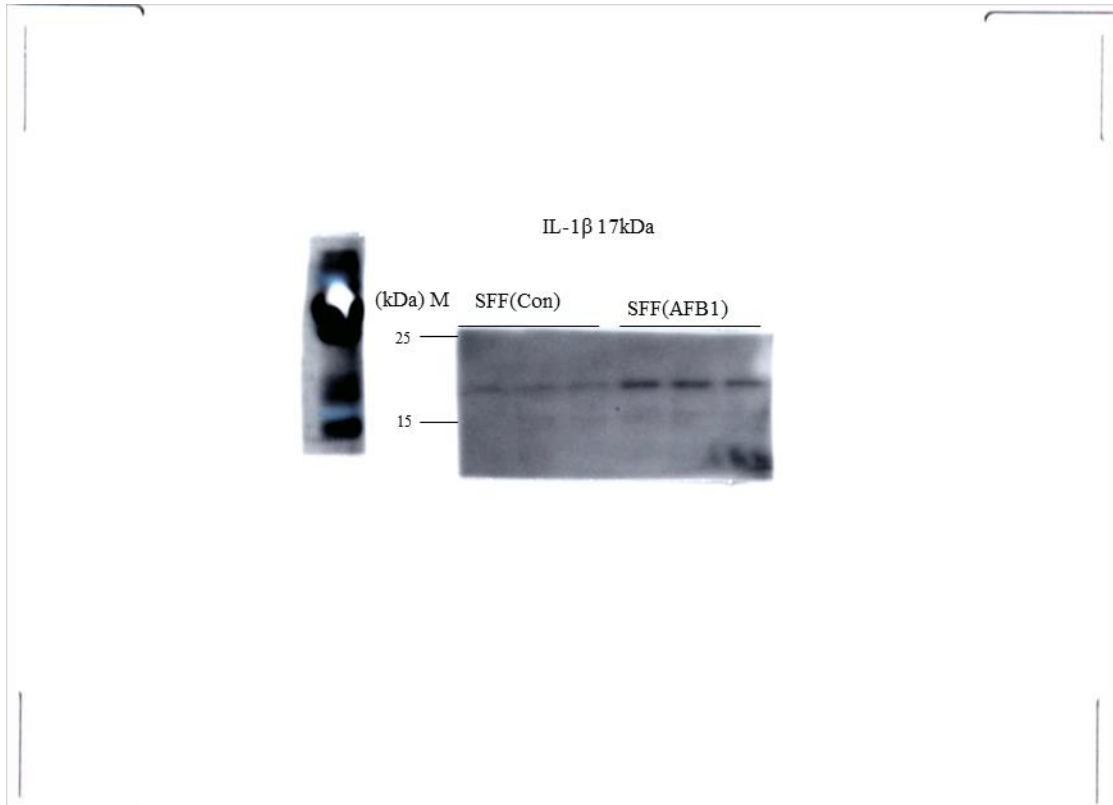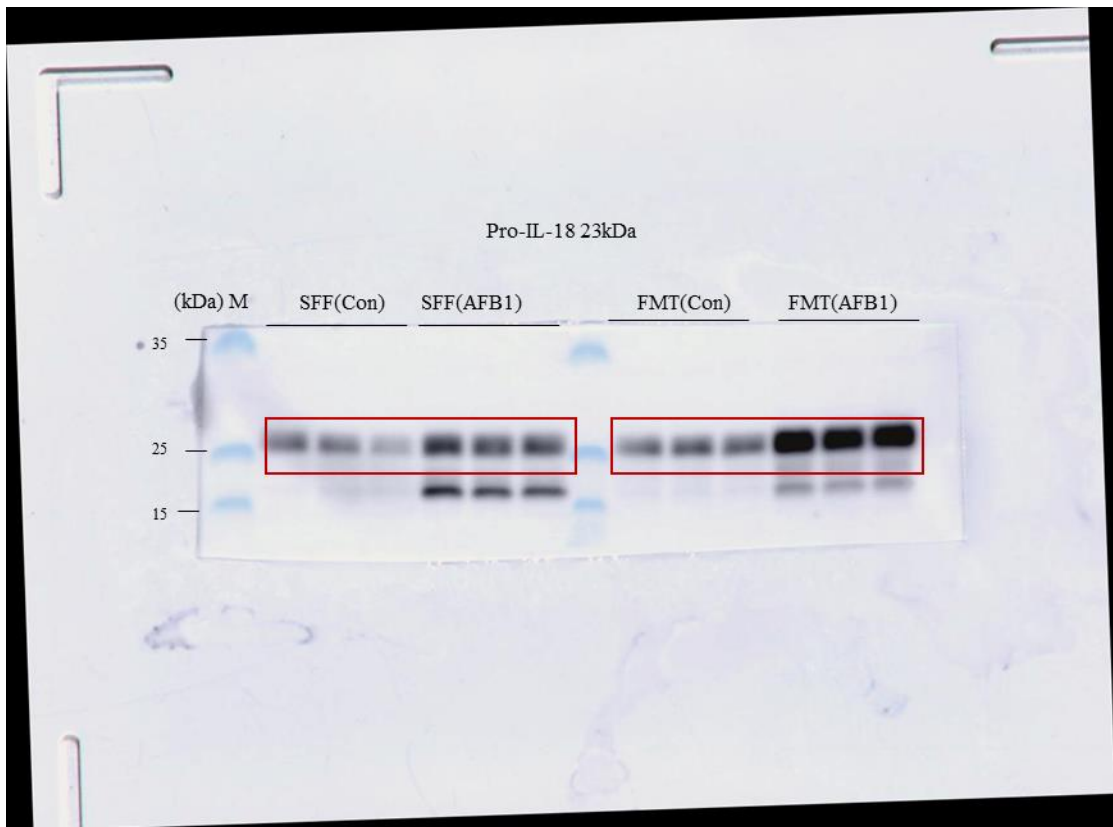



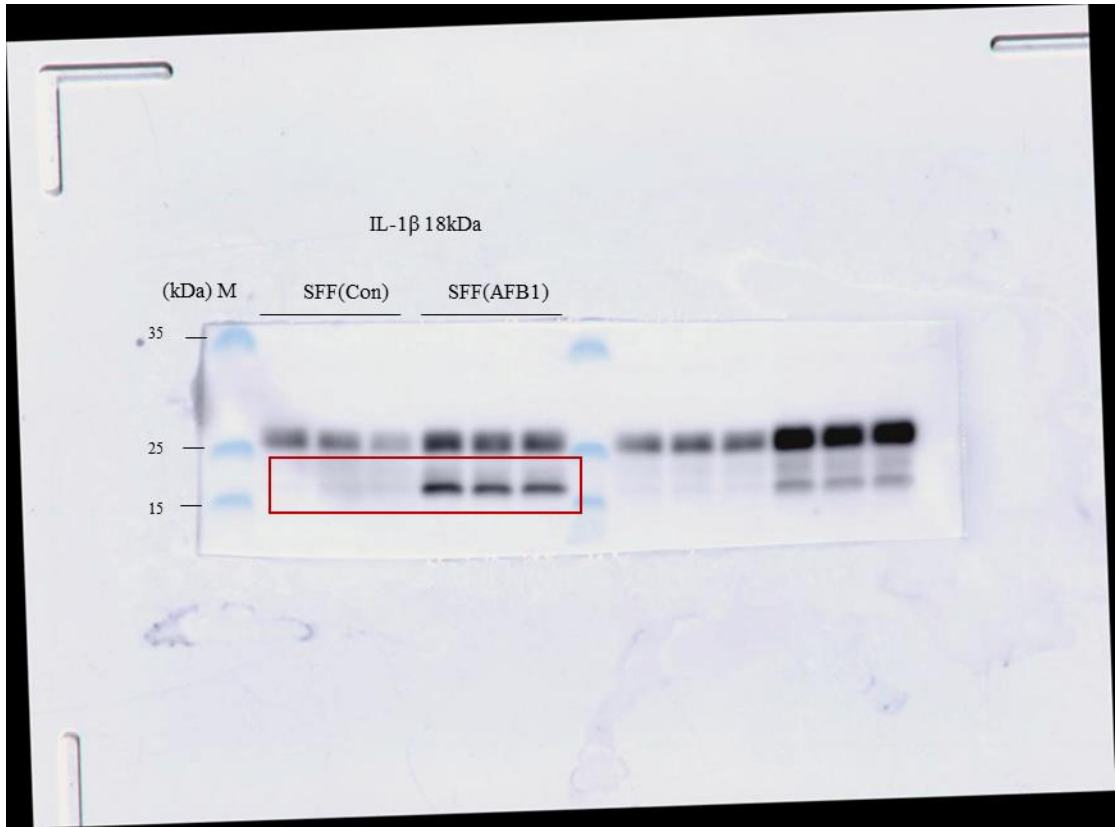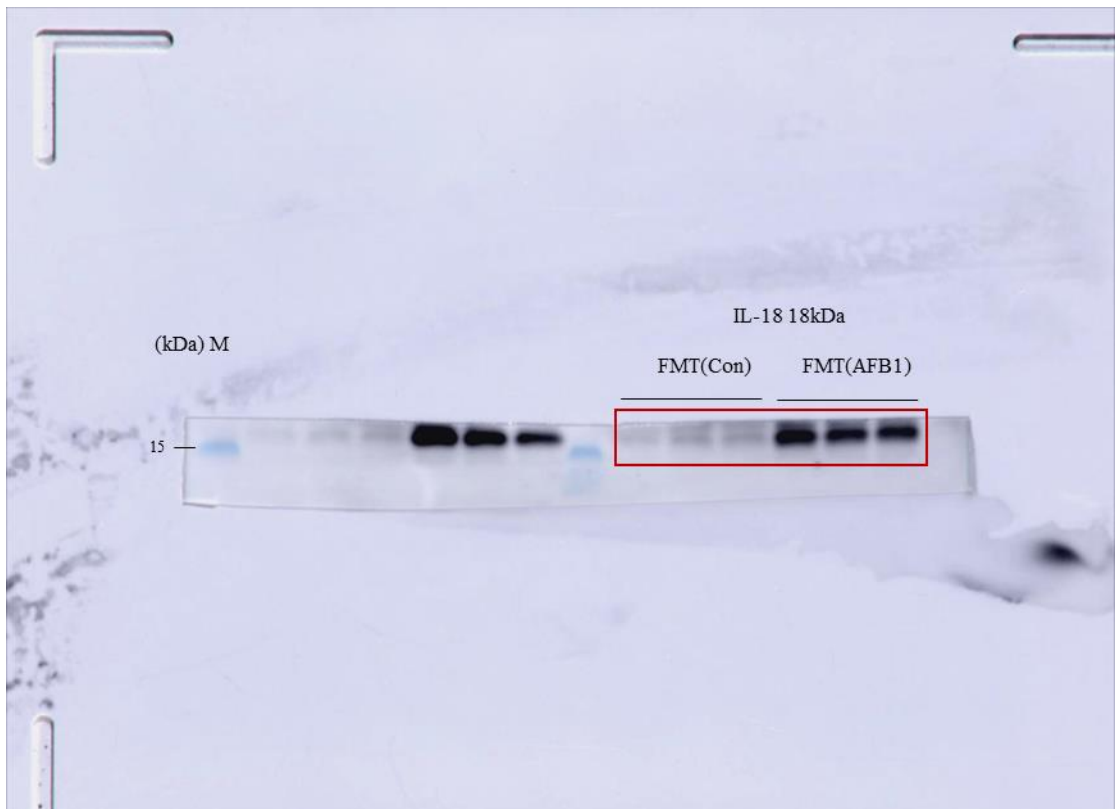

GAPDH 37kDa

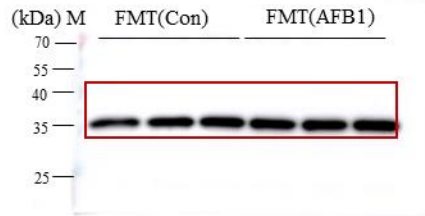

GAPDH 37kDa

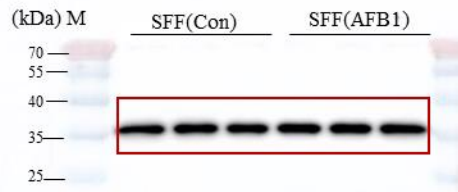

Supplement: d3fo04717b1.pdf [file d3fo04717b1.pdf]
