# Supplementary material for: Aflatoxin B1 exposure causes splenic pyroptosis by disturbing the gut microbiota-immune axis
Source: Royal Society of Chemistry journal article supplement (doi:10.1039/d3fo04717b), 2024-01-01
Supplement: d3fo04717b2.pdf [file d3fo04717b2.pdf]

1  
2  
3  
4  
5  
6  
7  
8  
9  
10  
11  
12  
13  
14  
15  
16  
17

## Supplementary Material

### **Aflatoxin B<sub>1</sub> exposure causes splenic pyroptosis via disturbing gut microbiota-immune axis**

Huodai Chen <sup>a</sup>, Lin Ye <sup>a</sup>, Yurun Wang <sup>a</sup>, Jiahong Chen <sup>a</sup>, Jie Wang <sup>a</sup>, Xueling Li <sup>a</sup>,  
Hongtao Lei <sup>\*a,b</sup>, Yunle Liu <sup>\*a,b</sup>.

<sup>a</sup> Guangdong Provincial Key Laboratory of Food Quality and Safety / National-Local  
Joint Engineering Research Center for Machining and Safety of Livestock and Poultry  
Products, South China Agricultural University, Guangzhou 510642, China

<sup>b</sup> Guangdong Laboratory for Lingnan Modern Agriculture, Guangzhou, 510642, China

\*Correspondence: Guangdong Provincial Key Laboratory of Food Quality and Safety,  
South China Agricultural University, 483 Wushan Road, Tianhe District, Guangzhou  
510642, China.

Yunle Liu, E-mail: liuyunle@scau.edu.cn.

Hongtao Lei, E-mail: hongtao@scau.edu.cn; Tel: +8620-8528 3925; Fax: +8620-8528  
0270.

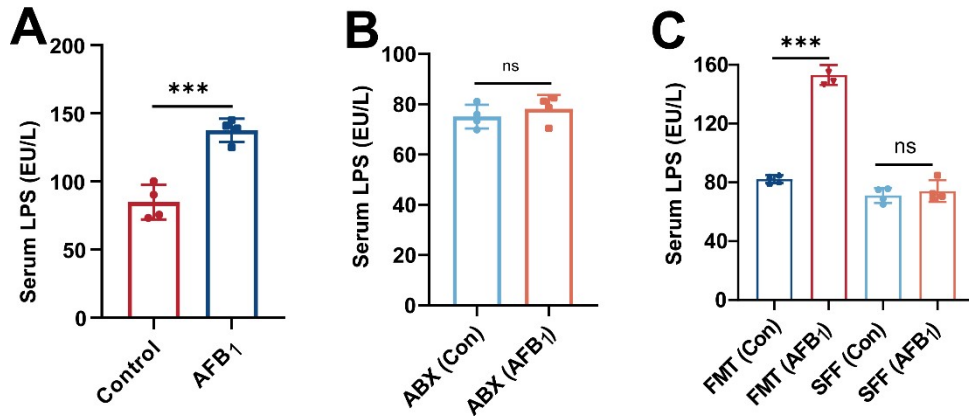

18

19 **Supplementary figure 1.** The levels of LPS in serum of mice. **(A)** The levels of LPS  
 20 in normal groups ( $n = 4$ ). **(B)** The levels of LPS in ABX groups ( $n = 4$ ). **(C)** The levels  
 21 of LPS in FMT groups and SFF groups ( $n = 4$ ). Values are means  $\pm$  SD. The statistical  
 22 significance was determined using Student t-tests (A, B) and two-way ANOVA  
 23 followed by post hoc test (C). The significance values are represented as follows: ns  
 24 (not significant) for  $p > 0.05$ , \* for  $p < 0.05$ , \*\* for  $p < 0.01$ , and \*\*\* for  $p < 0.001$ .

25

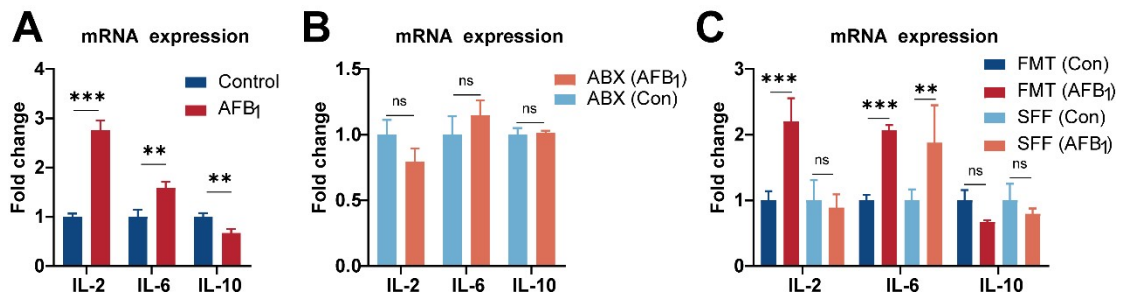

26

27 **Supplementary figure 2.** The effect of AFB<sub>1</sub> on cytokine expression levels in the  
 28 spleen cells of mice. **(A)** Relative mRNA expression of IL-2, IL-6 and IL-10 in normal  
 29 groups ( $n = 3$ ). **(B)** Relative mRNA expression of IL-2, IL-6 and IL-10 in ABX groups  
 30 ( $n = 3$ ). **(C)** Relative mRNA expression of IL-2, IL-6 and IL-10 in FMT groups and  
 31 SFF groups ( $n = 3$ ). Values are means  $\pm$  SD. The statistical significance was determined  
 32 using Student t-tests (A, B) and two-way ANOVA followed by post hoc test (C). The  
 33 significance values are represented as follows: ns (not significant) for  $p > 0.05$ , \* for  $p$   
 34  $< 0.05$ , \*\* for  $p < 0.01$ , and \*\*\* for  $p < 0.001$ .

35

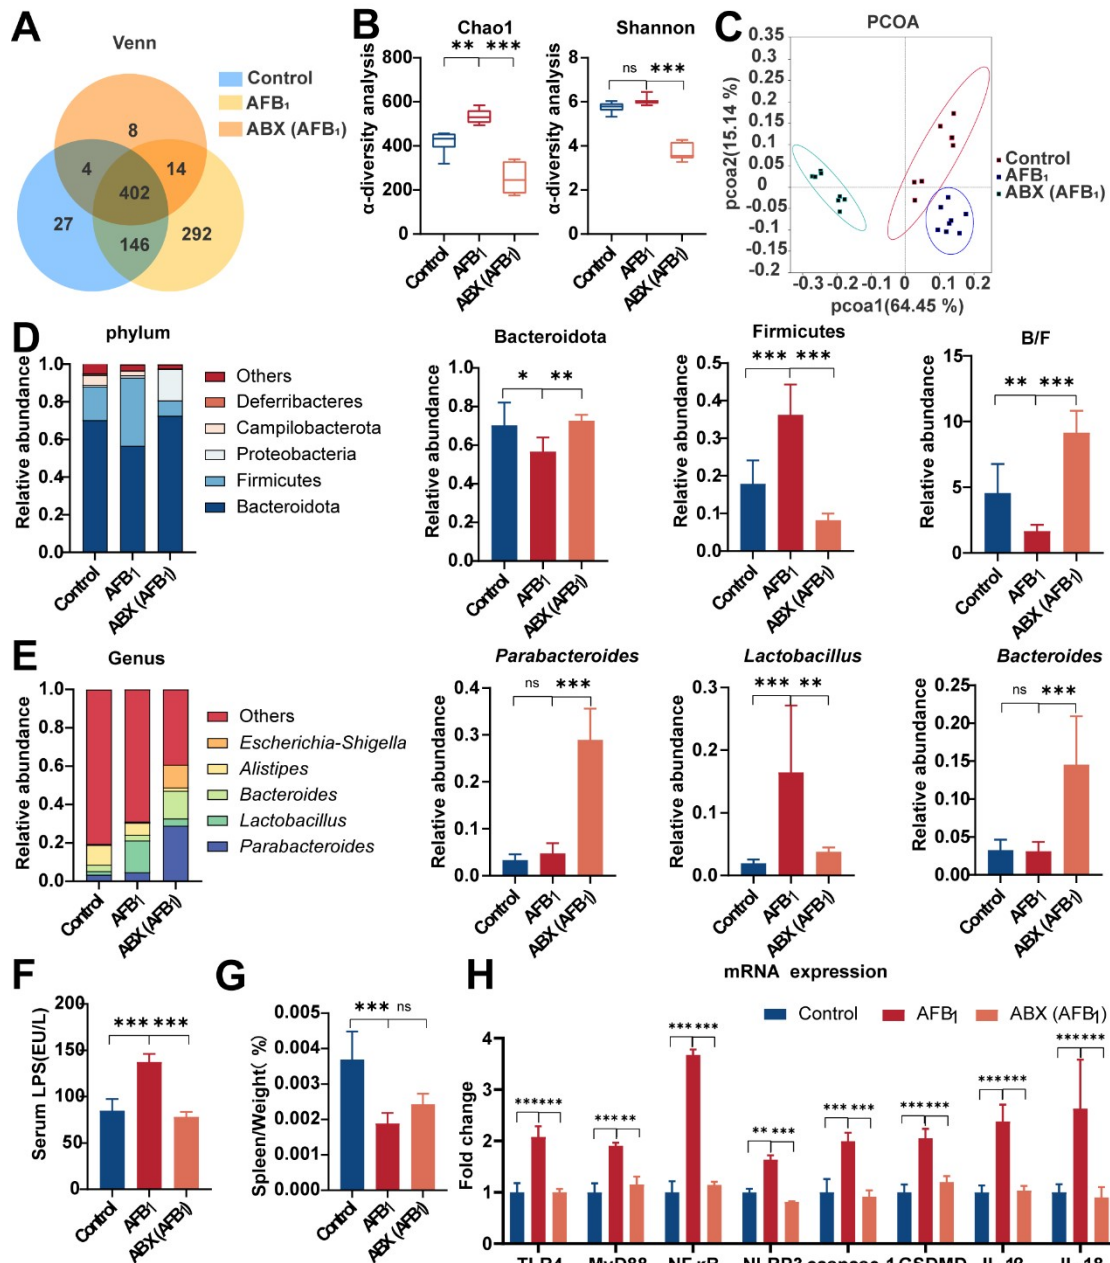

36

37 **Supplemental figure 3.** Antibiotic treatment reversed AFB<sub>1</sub>-induced splenic  
 38 pyroptosis mediated by disruption of gut microbiota. **(A)** OTU Venn diagram ( $n = 7$ ).  
 39 **(B)** Chao1 and Shannon indices in alpha diversity analysis ( $n = 7$ ). **(C)** PCoA of  
 40 weighted UniFrac distance matrix in inter-group distribution ( $n = 8$ ). **(D)** The gut  
 41 microbiota composition at the phylum level ( $n = 7$ ). **(E)** The gut microbiota composition  
 42 at the genus level ( $n = 7$ ). **(F)** ELISA measurement of LPS levels in serum ( $n = 5$ ). **(G)**  
 43 Spleen index ( $n = 6$ ). **(H)** Relative mRNA expression of TLR4, MyD88, NF-κB,  
 44 NLRP3, caspase-1, GSDMD, IL-1β, and IL-18 ( $n = 4$ ). Values are means ± SD. The  
 45 statistical significance was determined using two-way ANOVA followed by post hoc

46 test (H). The significance values are represented as follows: ns (not significant) for  $p >$   
 47 0.05, \* for  $p < 0.05$ , \*\* for  $p < 0.01$ , and \*\*\* for  $p < 0.001$ .

48

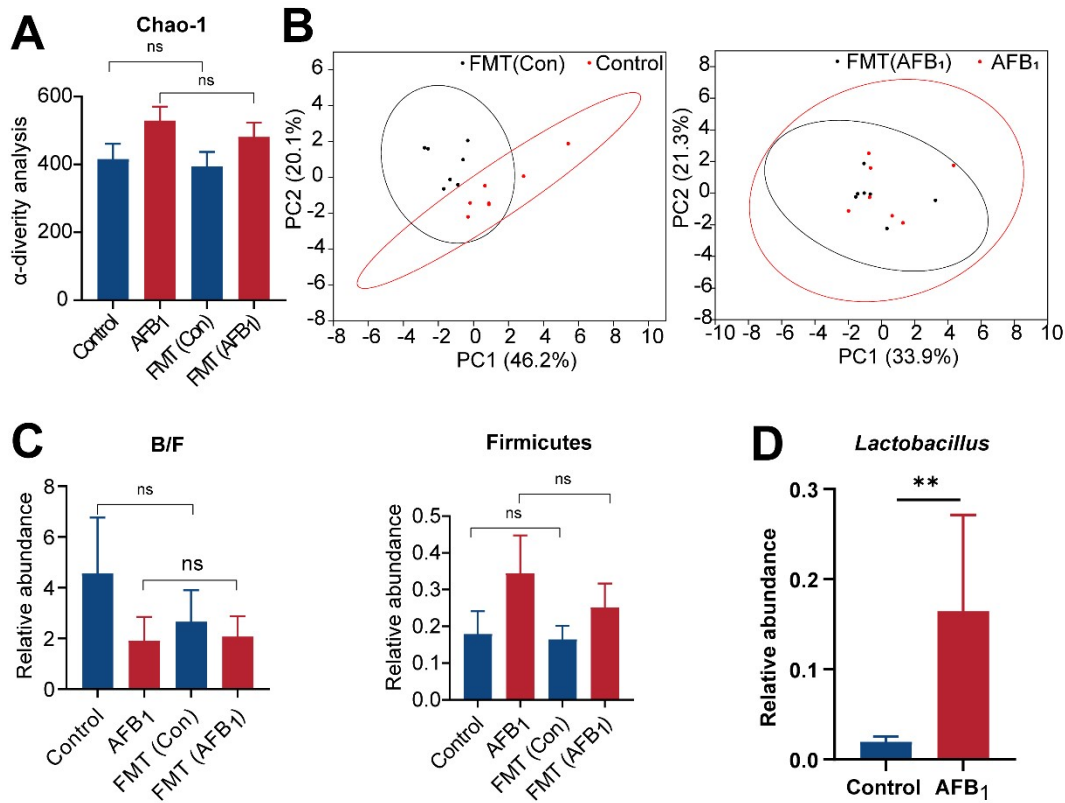

49

50 **Supplementary figure 4.** Gut microbiota from the control group and AFB<sub>1</sub> group have  
 51 been colonized in the colon of recipient mice. **(A)** Chao1 index ( $n = 7$ ). **(B)** Principal  
 52 component analysis (PCA) ( $n = 7$ ). **(C)** The ratio of Bacteroidota to Firmicutes at the  
 53 phylum level ( $n = 7$ ). **(D)** The abundance of *lactobacillus*. Values are means  $\pm$  SD. The  
 54 statistical significance was determined using two-way ANOVA followed by post hoc  
 55 test (A, C) and student t-tests (D). The significance values are represented as follows:  
 56 ns (not significant) for  $p > 0.05$ , \* for  $p < 0.05$ , \*\* for  $p < 0.01$ , and \*\*\* for  $p < 0.001$ .

57

## 58 **Supplementary table 1**

59 Primer sequences used for RT-qPCR

| Gene | Direction | Primer sequence (5'-3') |
|------|-----------|-------------------------|
|------|-----------|-------------------------|

---

|           |                |                                             |
|-----------|----------------|---------------------------------------------|
| TLR4      | Forward primer | 5'-TGA CCA CCC ATA TTG CCT ATA C-3'         |
| TLR4      | Reverse primer | 5'-TGA TGG TGT GAG CAG GAG AG-3'            |
| MyD88     | Forward primer | 5'-CGG CAA CTA GAA CAG ACA GAC TAT CG-      |
| MyD88     | Reverse primer | 3'<br>5'-TCT CAA TTA GCT CGC TGG CAA TGG-3' |
| NF-κB     | Forward primer | 5'-GAA CGA TAA CCT TTG CAG GC-3'            |
| NF-κB     | Reverse primer | 5'-TTT CGA TTC CGC TAT GTG TG-3'            |
| NLRP3     | Forward primer | 5'-ATT ACC CGC CCG AGA AAG G-3'             |
| NLRP3     | Reverse primer | 5'-TCG CAG CAA AGA TCC ACA CAG-3'           |
| Caspase-1 | Forward primer | 5'-ACA GCT CTG GAG ATG GTG A-3'             |
| Caspase-1 | Reverse primer | 5'-GGT CCC ACA TAT TCC CTC CT-3'            |
| GSDMD     | Forward primer | 5'-CCA TCG GCC TTT GAG AAA GTG-3'           |
| GSDMD     | Reverse primer | 5'-ACA CAT GAA TAA CGG GGT TTC C-3'         |
| IL-18     | Forward primer | 5'-GAC TCT TGC GTC AAC TTC AAG G-3'         |
| IL-18     | Reverse primer | 5'-CAG GCT GTC TTT TGT CAA CGA-3'           |
| IL-1β     | Forward primer | 5'-TCG CTC AGG GTC ACA AGA AA-3'            |
| IL-1β     | Reverse primer | 5'-CAT CAG AGG CAA GGA GGA AAA C-3'         |
| GADPH     | Forward primer | 5'-AGG TCG GTG TGA ACG GAT TTG-3'           |
| GADPH     | Reverse primer | 5'-GGG GTC GTT GAT GGC AAC A-3'             |

---

60

61 **Supplementary table 2**

62 Histopathological scoring of spleen tissue from different groups

| Degree Rating<br>(1-10)<br>Group | Blurring at the<br>Junction of Red and<br>White Marrow | Scattering in Cell<br>Distribution | Severity of Cell<br>Congestion |
|----------------------------------|--------------------------------------------------------|------------------------------------|--------------------------------|
| Control                          | 6                                                      | 4                                  | 5                              |
| AFB <sub>1</sub>                 | 7                                                      | 9                                  | 8                              |
| ABX (Con)                        | 5                                                      | 4                                  | 3                              |
| ABX (AFB <sub>1</sub> )          | 5                                                      | 5                                  | 4                              |
| FMT (Con)                        | 5                                                      | 4                                  | 3                              |
| FMT (AFB <sub>1</sub> )          | 6                                                      | 7                                  | 7                              |
| SFF (Con)                        | 3                                                      | 4                                  | 3                              |
| SFF (AFB <sub>1</sub> )          | 6                                                      | 8                                  | 7                              |

63

64 **Supplementary table 3**

65 ANOVA with an appropriate post hoc test for Figure 5B

| Significance<br>Figure 5 | main effects          |                         | interactions          | post hoc test                         |                                       |
|--------------------------|-----------------------|-------------------------|-----------------------|---------------------------------------|---------------------------------------|
|                          | FMT vs SFF            | Con vs AFB <sub>1</sub> |                       | FMT(Con) vs<br>FMT(AFB <sub>1</sub> ) | SFF(Con) vs<br>SFF(AFB <sub>1</sub> ) |
| (B) Chao-1               | F = 7.895<br>P < 0.05 | F = 2.634<br>P > 0.05   | F = 0.316<br>P > 0.05 | P > 0.05                              | P > 0.05                              |
| (B) Shannon              | F = 3.652<br>P > 0.05 | F = 18.442<br>P < 0.05  | F = 1.989<br>P > 0.05 | P < 0.05                              | P > 0.05                              |

66

67 **Supplementary table 4**

68 ANOVA with an appropriate post hoc test for Figure 6

| Significance<br>Figure 6          | main effects           |                         | interactions           | post hoc test                         |                                       |
|-----------------------------------|------------------------|-------------------------|------------------------|---------------------------------------|---------------------------------------|
|                                   | FMT vs SFF             | Con vs AFB <sub>1</sub> |                        | FMT(Con) vs<br>FMT(AFB <sub>1</sub> ) | SFF(Con) vs<br>SFF(AFB <sub>1</sub> ) |
| (A) Spleen/Weight<br>(%)          | F = 0.409<br>P > 0.05  | F = 63.603<br>P < 0.05  | F = 24.054<br>P < 0.05 | P < 0.05                              | P > 0.05                              |
| (B)<br>Histopathological<br>score | F = 0.125<br>P > 0.05  | F = 45.125<br>P < 0.05  | F = 1.125<br>P > 0.05  | P < 0.05                              | P < 0.05                              |
| (C) CD4/CD8                       | F = 4.549<br>P > 0.05  | F = 42.314<br>P < 0.05  | F = 0.292<br>P > 0.05  | P < 0.05                              | P < 0.05                              |
| (D) TLR4 mRNA<br>expression       | F = 70.170<br>P < 0.05 | F = 1.376E3<br>P < 0.05 | F = 70.170<br>P < 0.05 | P < 0.05                              | P < 0.05                              |
| (D) MyD88 mRNA<br>expression      | F = 26.483<br>P < 0.05 | F = 379.401<br>P < 0.05 | F = 26.483<br>P < 0.05 | P < 0.05                              | P < 0.05                              |

|                                         |                        |                         |                        |          |          |
|-----------------------------------------|------------------------|-------------------------|------------------------|----------|----------|
| (D) NF- $\kappa$ B mRNA expression      | F = 0.158<br>P > 0.05  | F = 618.503<br>P < 0.05 | F = 0.158<br>P > 0.05  | P < 0.05 | P < 0.05 |
| (D) NLRP3 mRNA expression               | F = 1.744<br>P > 0.05  | F = 56.618<br>P < 0.05  | F = 1.744<br>P > 0.05  | P < 0.05 | P < 0.05 |
| (D) Caspase-1 mRNA expression           | F = 44.079<br>P < 0.05 | F = 155.801<br>P < 0.05 | F = 44.079<br>P < 0.05 | P < 0.05 | P < 0.05 |
| (D) GSDMD mRNA expression               | F = 6.546<br>P < 0.05  | F = 47.164<br>P < 0.05  | F = 6.546<br>P < 0.05  | P < 0.05 | P < 0.05 |
| (D) IL-1 $\beta$ mRNA expression        | F = 0.041<br>P > 0.05  | F = 91.684<br>P < 0.05  | F = 0.041<br>P > 0.05  | P < 0.05 | P < 0.05 |
| (D) IL-18 mRNA expression               | F = 12.963<br>P < 0.05 | F = 62.128<br>P < 0.05  | F = 13.013<br>P < 0.05 | P < 0.05 | P < 0.05 |
| (E) TLR4 Protein expression             | F = 63.408<br>P < 0.05 | F = 227.933<br>P < 0.05 | F = 63.408<br>P < 0.05 | P < 0.05 | P < 0.05 |
| (E) NF- $\kappa$ B Protein expression   | F = 3.660<br>P > 0.05  | F = 40.392<br>P < 0.05  | F = 3.660<br>P > 0.05  | P < 0.05 | P < 0.05 |
| (E) P-NF- $\kappa$ B Protein expression | F = 93.262<br>P < 0.05 | F = 254.823<br>P < 0.05 | F = 93.262<br>P < 0.05 | P < 0.05 | P < 0.05 |
| (E) NLRP3 Protein expression            | F = 12.491<br>P < 0.05 | F = 90.092<br>P < 0.05  | F = 12.491<br>P < 0.05 | P < 0.05 | P < 0.05 |
| (E) Caspase-1 Protein expression        | F = 11.663<br>P < 0.05 | F = 21.402<br>P < 0.05  | F = 11.663<br>P < 0.05 | P < 0.05 | P < 0.05 |
| (E) Pro-IL-1 $\beta$ Protein expression | F = 2.724<br>P > 0.05  | F = 28.929<br>P < 0.05  | F = 2.724<br>P > 0.05  | P < 0.05 | P < 0.05 |
| (E) IL-1 $\beta$ Protein expression     | F = 4.956<br>P > 0.05  | F = 18.003<br>P < 0.05  | F = 4.956<br>P > 0.05  | P < 0.05 | P > 0.05 |
| (E) Pro-IL-18 Protein expression        | F = 7.609<br>P < 0.05  | F = 69.655<br>P < 0.05  | F = 7.609<br>P < 0.05  | P < 0.05 | P < 0.05 |
| (E) IL-18 Protein expression            | F = 10.074<br>P < 0.05 | F = 99.479<br>P < 0.05  | F = 10.074<br>P < 0.05 | P < 0.05 | P < 0.05 |
